# Supplementary material for: C10orf55, CASC2, and SFTA1P lncRNAs Are Potential Biomarkers to Assess Radiation Therapy Response in Head and Neck Cancers
Source: MDPI journal article supplement (doi:10.3390/jpm12101696), 2022-10-11
Supplement: s1 [file s1]

## Supplementary materials:

**Table S1.** Patients included in the study with division to responders group (RG) and non-responders group (NRG).

| Responders Group (RG) |                |                            | No-Responders Group (NRG) |                |                            |
|-----------------------|----------------|----------------------------|---------------------------|----------------|----------------------------|
| Sample ID             | OS time (days) | OS event (1-dead; 0-alive) | Sample ID                 | OS time (days) | OS event (1-dead; 0-alive) |
| TCGA-BA-5152-01       | 1288           | 0                          | TCGA-BA-4074-01           | 462            | 1                          |
| TCGA-BA-5558-01       | 1995           | 0                          | TCGA-BA-4076-01           | 415            | 1                          |
| TCGA-BA-7269-01       | 1273           | 0                          | TCGA-BA-4078-01           | 276            | 1                          |
| TCGA-BB-4223-01       | 3221           | 0                          | TCGA-BA-5149-01           | 806            | 1                          |
| TCGA-BB-7862-01       | 1117           | 0                          | TCGA-BA-6868-01           | 472            | 1                          |
| TCGA-BB-7864-01       | 1527           | 0                          | TCGA-BA-6870-01           | 451            | 1                          |
| TCGA-BB-7866-01       | 1368           | 0                          | TCGA-BA-6872-01           | 384            | 1                          |
| TCGA-BB-7870-01       | 2016           | 0                          | TCGA-BA-A6DD-01           | 173            | 1                          |
| TCGA-BB-7872-01       | 1168           | 0                          | TCGA-BA-A6DF-01           | 238            | 1                          |
| TCGA-BB-8596-01       | 2161           | 0                          | TCGA-BA-A6DG-01           | 69             | 1                          |
| TCGA-CN-4727-01       | 1560           | 0                          | TCGA-BA-A6DI-01           | 336            | 1                          |
| TCGA-CN-4728-01       | 1724           | 0                          | TCGA-BA-A6DJ-01           | 407            | 1                          |
| TCGA-CN-4734-01       | 1690           | 0                          | TCGA-BB-A5HY-01           | 321            | 1                          |
| TCGA-CN-4735-01       | 1737           | 0                          | TCGA-BB-A6UO-01           | 268            | 1                          |
| TCGA-CN-5360-01       | 2169           | 0                          | TCGA-CN-4742-01           | 397            | 1                          |
| TCGA-CN-5373-01       | 1584           | 0                          | TCGA-CN-5359-01           | 377            | 1                          |
| TCGA-CN-6010-01       | 1523           | 0                          | TCGA-CN-5364-01           | 493            | 1                          |
| TCGA-CN-6012-01       | 1460           | 0                          | TCGA-CN-5366-01           | 360            | 1                          |
| TCGA-CN-6016-01       | 1443           | 0                          | TCGA-CN-5367-01           | 352            | 1                          |
| TCGA-CN-6023-01       | 1584           | 0                          | TCGA-CN-6013-01           | 727            | 1                          |
| TCGA-CN-6992-01       | 1066           | 0                          | TCGA-CN-6017-01           | 853            | 1                          |
| TCGA-CQ-5323-01       | 1466           | 0                          | TCGA-CN-6020-01           | 205            | 1                          |
| TCGA-CQ-5327-01       | 1660           | 0                          | TCGA-CN-6996-01           | 530            | 1                          |
| TCGA-CQ-5330-01       | 1897           | 0                          | TCGA-CN-6998-01           | 357            | 1                          |
| TCGA-CQ-6218-01       | 1253           | 0                          | TCGA-CN-A498-01           | 773            | 1                          |
| TCGA-CQ-6222-01       | 2016           | 0                          | TCGA-CN-A49A-01           | 526            | 1                          |
| TCGA-CQ-6224-01       | 1721           | 0                          | TCGA-CN-A63W-01           | 377            | 1                          |
| TCGA-CQ-7064-01       | 1973           | 0                          | TCGA-CQ-5326-01           | 89             | 1                          |
| TCGA-CQ-7071-01       | 1311           | 0                          | TCGA-CQ-6228-01           | 456            | 1                          |
| TCGA-CQ-7072-01       | 2359           | 0                          | TCGA-CQ-A4CH-01           | 379            | 1                          |
| TCGA-CR-5243-01       | 2562           | 0                          | TCGA-CR-6474-01           | 564            | 1                          |
| TCGA-CR-5249-01       | 1152           | 0                          | TCGA-CR-6478-01           | 183            | 1                          |
| TCGA-CR-6467-01       | 1777           | 0                          | TCGA-CR-6493-01           | 282            | 1                          |
| TCGA-CR-6470-01       | 1521           | 0                          | TCGA-CR-7380-01           | 606            | 1                          |
| TCGA-CR-6472-01       | 1050           | 0                          | TCGA-CV-5431-01           | 522            | 1                          |
| TCGA-CR-6473-01       | 1125           | 0                          | TCGA-CV-5439-01           | 546            | 1                          |
| TCGA-CR-7365-01       | 1191           | 0                          | TCGA-CV-5966-01           | 545            | 1                          |

|                 |      |   |                 |     |   |
|-----------------|------|---|-----------------|-----|---|
| TCGA-CR-7367-01 | 1440 | 0 | TCGA-CV-6936-01 | 166 | 1 |
| TCGA-CR-7368-01 | 1245 | 0 | TCGA-CV-6941-01 | 342 | 1 |
| TCGA-CR-7386-01 | 1430 | 0 | TCGA-CV-6950-01 | 459 | 1 |
| TCGA-CR-7390-01 | 1508 | 0 | TCGA-CV-6952-01 | 185 | 1 |
| TCGA-CR-7392-01 | 1425 | 0 | TCGA-CV-6962-01 | 126 | 1 |
| TCGA-CR-7394-01 | 1346 | 0 | TCGA-CV-7252-01 | 151 | 1 |
| TCGA-CR-7404-01 | 1472 | 0 | TCGA-CV-7418-01 | 789 | 1 |
| TCGA-CV-5430-01 | 4241 | 0 | TCGA-CV-7429-01 | 107 | 1 |
| TCGA-CV-5440-01 | 3270 | 0 | TCGA-CV-7433-01 | 601 | 1 |
| TCGA-CV-5441-01 | 2886 | 0 | TCGA-CV-A45X-01 | 198 | 1 |
| TCGA-CV-5973-01 | 2641 | 0 | TCGA-CV-A468-01 | 464 | 1 |
| TCGA-CV-5977-01 | 1840 | 0 | TCGA-CV-A6JD-01 | 182 | 1 |
| TCGA-CV-5979-01 | 1315 | 0 | TCGA-CV-A6JO-01 | 197 | 1 |
| TCGA-CV-7090-01 | 5252 | 0 | TCGA-CV-A6K2-01 | 317 | 1 |
| TCGA-CV-7235-01 | 2347 | 0 | TCGA-D6-6515-01 | 403 | 1 |
| TCGA-CV-7238-01 | 2727 | 0 | TCGA-DQ-5631-01 | 548 | 1 |
| TCGA-CV-7261-01 | 1512 | 0 | TCGA-HD-8224-01 | 446 | 1 |
| TCGA-CV-A45R-01 | 5480 | 0 | TCGA-IQ-A61K-01 | 161 | 1 |
| TCGA-CX-A4AQ-01 | 1555 | 0 | TCGA-IQ-A61O-01 | 421 | 1 |
| TCGA-DQ-5624-01 | 1778 | 0 | TCGA-KU-A66S-01 | 406 | 1 |
| TCGA-DQ-7589-01 | 1409 | 0 | TCGA-KU-A6H8-01 | 327 | 1 |
| TCGA-DQ-7590-01 | 1413 | 0 | TCGA-P3-A5Q6-01 | 480 | 1 |
| TCGA-DQ-7592-01 | 1143 | 0 | TCGA-P3-A5QF-01 | 330 | 1 |
| TCGA-DQ-7593-01 | 1224 | 0 | TCGA-P3-A6T3-01 | 577 | 1 |
| TCGA-DQ-7594-01 | 1218 | 0 | TCGA-P3-A6T6-01 | 395 | 1 |
| TCGA-DQ-7595-01 | 1190 | 0 | TCGA-P3-A6T7-01 | 487 | 1 |
| TCGA-DQ-7596-01 | 1265 | 0 | TCGA-QK-A6IG-01 | 222 | 1 |
| TCGA-F7-7848-01 | 1131 | 0 | TCGA-QK-A6II-01 | 284 | 1 |
| TCGA-IQ-A61E-01 | 1147 | 0 | TCGA-QK-A8Z9-01 | 449 | 1 |
| TCGA-P3-A5QA-01 | 2182 | 0 | TCGA-QK-A8ZA-01 | 371 | 1 |
| TCGA-P3-A5QE-01 | 1559 | 0 | TCGA-RS-A6TO-01 | 387 | 1 |
| TCGA-P3-A6SW-01 | 1120 | 0 | TCGA-T2-A6WX-01 | 209 | 1 |
| TCGA-P3-A6T2-01 | 2298 | 0 | TCGA-T2-A6WZ-01 | 484 | 1 |
| TCGA-UF-A71B-01 | 1506 | 0 | TCGA-UF-A7JC-01 | 546 | 1 |
| TCGA-UF-A71D-01 | 1461 | 0 | TCGA-UF-A7JD-01 | 739 | 1 |
| TCGA-UF-A7J9-01 | 1358 | 0 | TCGA-UF-A7JK-01 | 424 | 1 |
| TCGA-UF-A7JA-01 | 2265 | 0 | TCGA-UF-A7JO-01 | 631 | 1 |
| TCGA-UF-A7JF-01 | 1686 | 0 | TCGA-UF-A7JS-01 | 680 | 1 |

**Table S2.** Main clinical and pathological parameters describing RG and NRG groups;  $p < 0.05$  considered as statistically significant.

| Parameter                         | Group          | RG (cases) | NRG (cases) | p-value |
|-----------------------------------|----------------|------------|-------------|---------|
| Gender                            | Male           | 60         | 55          | 0.3344  |
|                                   | Female         | 15         | 20          |         |
| Alcohol                           | Yes            | 61         | 57          | 0.4253  |
|                                   | no             | 14         | 18          |         |
| Smoking                           | Yes            | 27         | 34          | 0.2424  |
|                                   | No/ex          | 47         | 40          |         |
| Cancer stage                      | I, II          | 9          | 6           | 0.4142  |
|                                   | III, IV        | 66         | 69          |         |
| T-stage                           | T1+T2          | 21         | 12          | 0.0761  |
|                                   | T3+T4          | 54         | 63          |         |
| N-stage                           | N0             | 24         | 25          | 0.8621  |
|                                   | N1/2/3         | 50         | 48          |         |
| Grade                             | G1+G2          | 45         | 55          | 0.1241  |
|                                   | G3+G4          | 27         | 19          |         |
| Perineural invasion               | Positive       | 30         | 37          | 0.0816  |
|                                   | Negative       | 26         | 16          |         |
| Lymph node neck dissection        | Positive       | 60         | 66          | 0.4253  |
|                                   | negative       | 15         | 9           |         |
| HPV p16 status                    | Positive       | 7          | 2           | 0.1982  |
|                                   | Negative       | 15         | 13          |         |
| Targeted molecular therapy        | YES            | 37         | 39          | 0.3813  |
|                                   | NO             | 23         | 34          |         |
| Additional pharmaceutical therapy | YES            | 3          | 14          | 0.5274  |
|                                   | NO             | 6          | 17          |         |
| Localization                      | Buccal Mucosa  | 4          | 2           | 0.1231  |
|                                   | Floor of mouth | 6          | 15          |         |
|                                   | Tonsil         | 10         | 2           |         |
|                                   | Oral Tongue    | 18         | 20          |         |
|                                   | Larynx         | 20         | 13          |         |

|  |                |   |   |  |
|--|----------------|---|---|--|
|  | Oral Cavity    | 7 | 8 |  |
|  | HYPOPHARYNX    | 2 | 2 |  |
|  | Base of tongue | 4 | 4 |  |
|  | Alveolar Ridge | 3 | 6 |  |
|  | HARD PALATE    | 1 | 0 |  |
|  | Lip            | 0 | 1 |  |
|  | Oropharynx     | 0 | 2 |  |

**Table S3.** lncRNA expression profile in responders group (RG) and non-responders group (NRG) of patients to radiotherapy.

| lncRNA   | Group | Minimum | 25% Percentile | Median | 75% Percentile | Maximum | Range | Mean   | Std. Deviation | Std. Error of Mean |
|----------|-------|---------|----------------|--------|----------------|---------|-------|--------|----------------|--------------------|
| C10orf55 | RG    | 2.137   | 4.82           | 5.667  | 6.18           | 7.671   | 5.534 | 5.431  | 1.106          | 0.1295             |
|          | NRG   | 3.374   | 5.52           | 6.287  | 6.528          | 08.07   | 4.696 | 06.07  | 0.8949         | 0.1047             |
| C2orf27A | RG    | 1.729   | 3.315          | 3.884  | 4.875          | 7.594   | 5.865 | 4.121  | 1.077          | 0.126              |
|          | NRG   | 1.941   | 3.815          | 4.395  | 4.957          | 8.124   | 6.183 | 4.524  | 1.215          | 0.1422             |
| C3orf35  | RG    | 0       | 1.256          | 1.68   | 2.098          | 3.255   | 3.255 | 1.677  | 0.7767         | 0.09091            |
|          | NRG   | 0       | 1.396          | 2.069  | 2.615          | 4.356   | 4.356 | 2.081  | 0.944          | 0.1105             |
| C5orf38  | RG    | 0.3389  | 4.195          | 5.174  | 6.184          | 9.993   | 9.654 | 5.067  | 1.913          | 0.2223             |
|          | NRG   | 0       | 5.325          | 6.202  | 6.896          | 10.47   | 10.47 | 6.079  | 1.556          | 0.1809             |
| C5orf60  | RG    | 0       | 0              | 0.5158 | 0.9496         | 8.234   | 8.234 | 0.6538 | 1.082          | 0.1258             |
|          | NRG   | 0       | 0              | 0      | 0.6096         | 4.711   | 4.711 | 0.4668 | 0.8302         | 0.09651            |
| C6orf223 | RG    | 0.8317  | 2.518          | 4.59   | 6.752          | 8.969   | 8.137 | 4.681  | 2.307          | 0.2682             |
|          | NRG   | 0       | 2.156          | 2.859  | 5.757          | 9.599   | 9.599 | 3.832  | 2.322          | 0.27               |
| CASC2    | RG    | 2.338   | 3.701          | 4.184  | 4.851          | 8.234   | 5.896 | 4.282  | 0.9644         | 0.1121             |
|          | NRG   | 1.241   | 3.421          | 3.839  | 4.341          | 5.73    | 4.489 | 3.874  | 0.8408         | 0.09774            |
| HCP5     | RG    | 6.603   | 9.409          | 10.43  | 10.97          | 12.05   | 5.449 | 10.2   | 01.06          | 0.124              |
|          | NRG   | 7.286   | 10.12          | 10.83  | 11.21          | 12.32   | 5.033 | 10.59  | 1.013          | 0.1185             |

|         |     |       |        |        |        |       |       |        |        |         |
|---------|-----|-------|--------|--------|--------|-------|-------|--------|--------|---------|
| HHLA3   | RG  | 4.482 | 5.967  | 6.468  | 6.994  | 9.606 | 5.124 | 6.48   | 0.9244 | 0.1082  |
|         | NRG | 4.861 | 6.294  | 6.826  | 7.289  | 8.909 | 4.047 | 6.814  | 0.8444 | 0.09883 |
| MEG3    | RG  | 0.677 | 3.465  | 4.693  | 5.656  | 8.576 | 7.899 | 4.674  | 1.676  | 0.1962  |
|         | NRG | 1.107 | 4.363  | 5.324  | 6.839  | 9.584 | 8.477 | 5.497  | 1.75   | 0.2048  |
| MYCNOS  | RG  | 0     | 0      | 0      | 0.6541 | 1.873 | 1.873 | 0.4144 | 0.5473 | 0.06405 |
|         | NRG | 0     | 0      | 0      | 0      | 1.319 | 1.319 | 0.135  | 0.3246 | 0.03799 |
| NEAT1   | RG  | 9.566 | 11.36  | 12.3   | 12.91  | 14.97 | 5.403 | 12.07  | 1.052  | 0.1231  |
|         | NRG | 9.572 | 11.66  | 12.58  | 13.43  | 14.83 | 5.253 | 12.48  | 1.304  | 0.1527  |
| PVT1    | RG  | 4.487 | 6.017  | 6.73   | 7.349  | 10.21 | 5.726 | 6.719  | 1.063  | 0.1244  |
|         | NRG | 5.225 | 6.356  | 6.943  | 7.718  | 9.171 | 3.946 | 7.079  | 0.9052 | 0.1059  |
| RFPL1S  | RG  | 0     | 1.059  | 1.888  | 3.164  | 7.916 | 7.916 | 2.527  | 1.98   | 0.2317  |
|         | NRG | 0     | 0.6681 | 1.369  | 2.601  | 8.626 | 8.626 | 1.817  | 1.617  | 0.1893  |
| SFTA1P  | RG  | 0     | 0.8037 | 1.765  | 3.569  | 8.88  | 8.88  | 2.259  | 1.878  | 0.2198  |
|         | NRG | 0     | 1.728  | 2.797  | 4.637  | 8.802 | 8.802 | 3.266  | 02.04  | 0.2388  |
| SMCR5   | RG  | 0     | 0      | 0.5542 | 1.091  | 2.239 | 2.239 | 0.6252 | 0.6377 | 0.07464 |
|         | NRG | 0     | 0      | 0      | 0.6897 | 3.097 | 3.097 | 0.4221 | 0.6414 | 0.07507 |
| SNHG10  | RG  | 3.174 | 4.868  | 5.621  | 6.265  | 7.343 | 4.169 | 5.56   | 1.018  | 0.1191  |
|         | NRG | 3.542 | 5.129  | 6.024  | 6.883  | 9.273 | 5.731 | 6.005  | 1.11   | 0.1299  |
| SNHG3   | RG  | 3.346 | 4.748  | 5.687  | 6.576  | 8.036 | 4.689 | 5.672  | 1.178  | 0.1378  |
|         | NRG | 3.764 | 5.465  | 6.207  | 7.113  | 9.377 | 5.612 | 6.24   | 1.163  | 0.1361  |
| SNHG7   | RG  | 5.89  | 7.755  | 8.412  | 9.049  | 11.31 | 5.424 | 8.466  | 01.02  | 0.1194  |
|         | NRG | 6.424 | 8.016  | 8.731  | 9.522  | 12.18 | 5.757 | 8.826  | 1.115  | 0.1305  |
| TMEM105 | RG  | 0     | 1.976  | 2.92   | 4.098  | 6.634 | 6.634 | 3.013  | 1.566  | 0.1833  |
|         | NRG | 0     | 3.115  | 3.938  | 5.079  | 7.105 | 7.105 | 3.951  | 1.614  | 0.1889  |

**Table S4.** Area under the ROC Curve (AUC) to discriminate between the RG and NRG groups;  $p < 0.05$  considered as statistically significant.

| lncRNA  | AUC    | p-value | Std. Error |
|---------|--------|---------|------------|
| C5orf60 | 0.5898 | 0.0592  | 0.04706    |
| SNHG7   | 0.5954 | 0.0466  | 0.04705    |

|          |        |        |         |
|----------|--------|--------|---------|
| C2orf27A | 0.5996 | 0.0377 | 0.04735 |
| SMCR5    | 0.6027 | 0.0321 | 0.04697 |
| PVT1     | 0.6042 | 0.0297 | 0.04663 |
| RFPL1S   | 0.6056 | 0.0277 | 0.0466  |
| C6orf223 | 0.6063 | 0.0256 | 0.04684 |
| NEAT1    | 0.6078 | 0.0245 | 0.04703 |
| SNHG10   | 0.6082 | 0.024  | 0.0465  |
| HCP5     | 0.6181 | 0.0137 | 0.04637 |
| HHLA3    | 0.6191 | 0.013  | 0.04653 |
| CASC2    | 0.6211 | 0.011  | 0.04588 |
| C3orf35  | 0.6239 | 0.0097 | 0.04666 |
| SNHG3    | 0.6292 | 0.007  | 0.04587 |
| MEG3     | 0.6319 | 0.0059 | 0.04598 |
| MYCNOS   | 0.6544 | 0.0013 | 0.04554 |
| SFTA1P   | 0.6577 | 0.001  | 0.04509 |
| TMEM105  | 0.672  | 0.0003 | 0.04492 |
| C5orf38  | 0.6777 | 0.0002 | 0.0442  |
| C10orf55 | 0.6784 | 0.0002 | 0.04433 |

**Table S5.** Mean expression level of lncRNAs in healthy and HNSCC patients;  $p < 0.05$  considered as statistically significant.

| lncRNA   | Healthy (Mean expression) | Patients (Mean expression) | p-val  |
|----------|---------------------------|----------------------------|--------|
| SNHG3    | 5.193                     | 5.92                       | 0.0001 |
| C5orf60  | 0.1832                    | 0.5528                     | 0.0002 |
| PVT1     | 6.415                     | 6.875                      | 0.0013 |
| C6orf223 | 3.461                     | 4.408                      | 0.0135 |
| TMEM105  | 2.843                     | 3.323                      | 0.0357 |
| MYCNOS   | 0.4133                    | 0.2998                     | 0.0472 |
| NEAT1    | 11.92                     | 12.26                      | 0.0841 |
| MEG3     | 5.534                     | 4.946                      | 0.1824 |
| SMCR5    | 0.4419                    | 0.4953                     | 0.5756 |
| SNHG7    | 8.77                      | 8.679                      | 0.5826 |
| C3orf35  | 1.826                     | 1.772                      | 0.6029 |
| CASC2    | 4.251                     | 4.034                      | 0.7752 |

|          |       |       |          |
|----------|-------|-------|----------|
| HHLA3    | 6.592 | 6.621 | 0.8326   |
| RFPL1S   | 1.936 | 2.229 | 0.9121   |
| C10orf55 | 4.283 | 5.653 | < 0.0001 |
| C2orf27A | 3.511 | 4.257 | < 0.0001 |
| C5orf38  | 4.518 | 5.583 | < 0.0001 |
| HCP5     | 9.294 | 10.4  | < 0.0001 |
| SFTA1P   | 1.04  | 2.591 | < 0.0001 |
| SNHG10   | 5.099 | 5.849 | < 0.0001 |

**Table S6.** GSEA analysis of genes enriched in the set of 150 HNSCC patients (RG and NRG groups) depending on expression level of specified lncRNA (high or low groups divided based on median expression of lncRNA); only the gene sets with nominal  $p < 0.05$  were presented; *NES*—normalized enrichment score, *FDR q-value*—false discovery rate, *SIZE*—number of enriched genes in a specified process; and further analysis of genes included in GSEA results (*FDR* < 0.27 and  $p < 0.05$ ).

| lncRNA  | Process/Pathway                   | SIZE (number of genes enriched in process/pathway) | FDR q-value | p-value     | Enrichment in group of patients with expression level of lncRNA |
|---------|-----------------------------------|----------------------------------------------------|-------------|-------------|-----------------------------------------------------------------|
| SFTA1   | EPITHELIAL MESENCHYMAL TRANSITION | 194                                                | 0.12196739  | 0.0         | high                                                            |
| SNHG3   | DNA REPAIR                        | 139                                                | 0.14401889  | 0.040733196 | high                                                            |
| SFTA1   | ANGIOGENESIS                      | 36                                                 | 0.22596863  | 0.001996008 | high                                                            |
| SFTA1   | COAGULATION                       | 136                                                | 0.25195256  | 0.008       | high                                                            |
| MEG3    | MITOTIC SPINDLE                   | 196                                                | 0.029923137 | 0.003944773 | low                                                             |
| CASC2   | P53 PATHWAY                       | 190                                                | 0.030040383 | 0.0         | low                                                             |
| C3orf35 | MITOTIC SPINDLE                   | 196                                                | 0.087503836 | 0.018292682 | low                                                             |
| MEG3    | G2M CHECKPOINT                    | 184                                                | 0.10796102  | 0.036734693 | low                                                             |
| C3orf35 | ANDROGEN RESPONSE                 | 96                                                 | 0.25371048  | 0.01934236  | low                                                             |
| C3orf35 | UV RESPONSE DN                    | 137                                                | 0.26422462  | 0.014553014 | low                                                             |

**Table S7.** Genes enriched in the group of patients with higher levels of SFTA1 and SNHG3 lncRNAs and lower levels of C3orf35, CASC2, and MEG3, and connected with ionization radiation response.

| lncRNA  | Enrichment in lncRNA-expressing group | Gene                   | Process/Pathway |
|---------|---------------------------------------|------------------------|-----------------|
| C3ORF35 | Low                                   | <a href="#">IQGAP2</a> | UV_RESPONSE_DN  |
| C3ORF35 | Low                                   | <a href="#">ELK4</a>   | UV_RESPONSE_DN  |
| C3ORF35 | Low                                   | <a href="#">INPP4B</a> | UV_RESPONSE_DN  |
| C3ORF35 | Low                                   | <a href="#">AKAP12</a> | UV_RESPONSE_DN  |

|         |     |                         |                 |
|---------|-----|-------------------------|-----------------|
| C3ORF35 | Low | <a href="#">ABHD2</a>   | UV_RESPONSE_DN  |
| C3ORF35 | Low | <a href="#">STEAP4</a>  | UV_RESPONSE_DN  |
| C3ORF35 | Low | <a href="#">MERTK</a>   | UV_RESPONSE_DN  |
| C3ORF35 | Low | <a href="#">AZGP1</a>   | UV_RESPONSE_DN  |
| C3ORF35 | Low | <a href="#">HERC3</a>   | UV_RESPONSE_DN  |
| C3ORF35 | Low | <a href="#">KLK3</a>    | UV_RESPONSE_DN  |
| C3ORF35 | Low | <a href="#">ZMIZ1</a>   | UV_RESPONSE_DN  |
| C3ORF35 | Low | <a href="#">ARID5B</a>  | UV_RESPONSE_DN  |
| C3ORF35 | Low | <a href="#">CDK6</a>    | UV_RESPONSE_DN  |
| C3ORF35 | Low | <a href="#">SLC26A2</a> | UV_RESPONSE_DN  |
| C3ORF35 | Low | <a href="#">ABCC4</a>   | UV_RESPONSE_DN  |
| C3ORF35 | Low | <a href="#">ADAMTS1</a> | UV_RESPONSE_DN  |
| C3ORF35 | Low | <a href="#">HPGD</a>    | UV_RESPONSE_DN  |
| C3ORF35 | Low | <a href="#">RPS6KA3</a> | UV_RESPONSE_DN  |
| C3ORF35 | Low | <a href="#">NCOA4</a>   | UV_RESPONSE_DN  |
| C3ORF35 | Low | <a href="#">PDLIM5</a>  | UV_RESPONSE_DN  |
| C3ORF35 | Low | <a href="#">PTPN21</a>  | UV_RESPONSE_DN  |
| C3ORF35 | Low | <a href="#">SORD</a>    | UV_RESPONSE_DN  |
| C3ORF35 | Low | <a href="#">MAP7</a>    | UV_RESPONSE_DN  |
| C3ORF35 | Low | <a href="#">ELL2</a>    | UV_RESPONSE_DN  |
| C3ORF35 | Low | <a href="#">PIAS1</a>   | UV_RESPONSE_DN  |
| C3ORF35 | Low | <a href="#">SEC24D</a>  | UV_RESPONSE_DN  |
| C3ORF35 | Low | <a href="#">ALDH1A3</a> | UV_RESPONSE_DN  |
| C3ORF35 | Low | <a href="#">APBP2</a>   | UV_RESPONSE_DN  |
| C3ORF35 | Low | <a href="#">PGM3</a>    | UV_RESPONSE_DN  |
| C3ORF35 | Low | <a href="#">ITGAV</a>   | UV_RESPONSE_DN  |
| C3ORF35 | Low | <a href="#">HMGCR</a>   | UV_RESPONSE_DN  |
| C3ORF35 | Low | <a href="#">MAF</a>     | UV_RESPONSE_DN  |
| C3ORF35 | Low | <a href="#">KRT19</a>   | UV_RESPONSE_DN  |
| C3ORF35 | Low | <a href="#">GSR</a>     | UV_RESPONSE_DN  |
| C3ORF35 | Low | <a href="#">LMAN1</a>   | UV_RESPONSE_DN  |
| C3ORF35 | Low | <a href="#">ACTN1</a>   | UV_RESPONSE_DN  |
| C3ORF35 | Low | <a href="#">B4GALT1</a> | UV_RESPONSE_DN  |
| C3ORF35 | Low | <a href="#">CDC14B</a>  | UV_RESPONSE_DN  |
| C3ORF35 | Low | <a href="#">SLC38A2</a> | UV_RESPONSE_DN  |
| C3ORF35 | Low | <a href="#">SCD</a>     | UV_RESPONSE_DN  |
| C3ORF35 | Low | <a href="#">NDRG1</a>   | UV_RESPONSE_DN  |
| C3ORF35 | Low | <a href="#">DHCR24</a>  | UV_RESPONSE_DN  |
| C3ORF35 | Low | <a href="#">ZBTB10</a>  | UV_RESPONSE_DN  |
| C3ORF35 | Low | <a href="#">UBE2J1</a>  | UV_RESPONSE_DN  |
| C3ORF35 | Low | <a href="#">ELOVL5</a>  | UV_RESPONSE_DN  |
| C3ORF35 | Low | <a href="#">RAPGEF6</a> | MITOTIC_SPINDLE |
| C3ORF35 | Low | <a href="#">LATS1</a>   | MITOTIC_SPINDLE |
| C3ORF35 | Low | <a href="#">RASA2</a>   | MITOTIC_SPINDLE |



|         |     |                          |                 |
|---------|-----|--------------------------|-----------------|
| C3ORF35 | Low | <a href="#">DOCK2</a>    | MITOTIC_SPINDLE |
| C3ORF35 | Low | <a href="#">APC</a>      | MITOTIC_SPINDLE |
| C3ORF35 | Low | <a href="#">BRCA2</a>    | MITOTIC_SPINDLE |
| C3ORF35 | Low | <a href="#">DOCK4</a>    | MITOTIC_SPINDLE |
| C3ORF35 | Low | <a href="#">OPHN1</a>    | MITOTIC_SPINDLE |
| C3ORF35 | Low | <a href="#">NOTCH2</a>   | MITOTIC_SPINDLE |
| C3ORF35 | Low | <a href="#">ARHGEF12</a> | MITOTIC_SPINDLE |
| C3ORF35 | Low | <a href="#">PREX1</a>    | MITOTIC_SPINDLE |
| C3ORF35 | Low | <a href="#">SORBS2</a>   | MITOTIC_SPINDLE |
| C3ORF35 | Low | <a href="#">PPP4R2</a>   | MITOTIC_SPINDLE |
| C3ORF35 | Low | <a href="#">FGD6</a>     | MITOTIC_SPINDLE |
| C3ORF35 | Low | <a href="#">ARHGAP29</a> | MITOTIC_SPINDLE |
| C3ORF35 | Low | <a href="#">INCENP</a>   | MITOTIC_SPINDLE |
| C3ORF35 | Low | <a href="#">TRIO</a>     | MITOTIC_SPINDLE |
| C3ORF35 | Low | <a href="#">CCDC88A</a>  | MITOTIC_SPINDLE |
| C3ORF35 | Low | <a href="#">NF1</a>      | MITOTIC_SPINDLE |
| C3ORF35 | Low | <a href="#">KIF20B</a>   | MITOTIC_SPINDLE |
| C3ORF35 | Low | <a href="#">ALMS1</a>    | MITOTIC_SPINDLE |
| C3ORF35 | Low | <a href="#">SSH2</a>     | MITOTIC_SPINDLE |
| C3ORF35 | Low | <a href="#">ROCK1</a>    | MITOTIC_SPINDLE |
| C3ORF35 | Low | <a href="#">ARHGAP5</a>  | MITOTIC_SPINDLE |
| C3ORF35 | Low | <a href="#">KIF1B</a>    | MITOTIC_SPINDLE |
| C3ORF35 | Low | <a href="#">SPTBN1</a>   | MITOTIC_SPINDLE |
| C3ORF35 | Low | <a href="#">AKAP13</a>   | MITOTIC_SPINDLE |
| C3ORF35 | Low | <a href="#">SMC1A</a>    | MITOTIC_SPINDLE |
| C3ORF35 | Low | <a href="#">RALBP1</a>   | MITOTIC_SPINDLE |
| C3ORF35 | Low | <a href="#">CLASP1</a>   | MITOTIC_SPINDLE |
| C3ORF35 | Low | <a href="#">MYH10</a>    | MITOTIC_SPINDLE |
| C3ORF35 | Low | <a href="#">RAPGEF5</a>  | MITOTIC_SPINDLE |
| C3ORF35 | Low | <a href="#">SOS1</a>     | MITOTIC_SPINDLE |
| C3ORF35 | Low | <a href="#">CLIP2</a>    | MITOTIC_SPINDLE |
| C3ORF35 | Low | <a href="#">DST</a>      | MITOTIC_SPINDLE |
| C3ORF35 | Low | <a href="#">WASF2</a>    | MITOTIC_SPINDLE |
| C3ORF35 | Low | <a href="#">DYNC1H1</a>  | MITOTIC_SPINDLE |
| C3ORF35 | Low | <a href="#">SHROOM2</a>  | MITOTIC_SPINDLE |
| C3ORF35 | Low | <a href="#">PDLIM5</a>   | MITOTIC_SPINDLE |
| C3ORF35 | Low | <a href="#">VCL</a>      | MITOTIC_SPINDLE |
| C3ORF35 | Low | <a href="#">MYH9</a>     | MITOTIC_SPINDLE |
| C3ORF35 | Low | <a href="#">TIAM1</a>    | MITOTIC_SPINDLE |
| C3ORF35 | Low | <a href="#">CKAP5</a>    | MITOTIC_SPINDLE |
| C3ORF35 | Low | <a href="#">SMC3</a>     | MITOTIC_SPINDLE |
| C3ORF35 | Low | <a href="#">HOOK3</a>    | MITOTIC_SPINDLE |
| C3ORF35 | Low | <a href="#">FGD4</a>     | MITOTIC_SPINDLE |
| C3ORF35 | Low | <a href="#">MYO1E</a>    | MITOTIC_SPINDLE |

|         |     |                          |                 |
|---------|-----|--------------------------|-----------------|
| C3ORF35 | Low | <a href="#">SPTAN1</a>   | MITOTIC_SPINDLE |
| C3ORF35 | Low | <a href="#">CLIP1</a>    | MITOTIC_SPINDLE |
| C3ORF35 | Low | <a href="#">NIN</a>      | MITOTIC_SPINDLE |
| C3ORF35 | Low | <a href="#">ECT2</a>     | MITOTIC_SPINDLE |
| C3ORF35 | Low | <a href="#">EPB41L2</a>  | MITOTIC_SPINDLE |
| C3ORF35 | Low | <a href="#">MID1</a>     | MITOTIC_SPINDLE |
| C3ORF35 | Low | <a href="#">CDC42BPA</a> | MITOTIC_SPINDLE |
| C3ORF35 | Low | <a href="#">RASA1</a>    | MITOTIC_SPINDLE |
| C3ORF35 | Low | <a href="#">FLNA</a>     | MITOTIC_SPINDLE |
| C3ORF35 | Low | <a href="#">WASL</a>     | MITOTIC_SPINDLE |
| C3ORF35 | Low | <a href="#">RAB3GAP1</a> | MITOTIC_SPINDLE |
| C3ORF35 | Low | <a href="#">ARFGEF1</a>  | MITOTIC_SPINDLE |
| C3ORF35 | Low | <a href="#">ARHGEF11</a> | MITOTIC_SPINDLE |
| C3ORF35 | Low | <a href="#">CEP192</a>   | MITOTIC_SPINDLE |
| C3ORF35 | Low | <a href="#">EPB41</a>    | MITOTIC_SPINDLE |
| C3ORF35 | Low | <a href="#">RICTOR</a>   | MITOTIC_SPINDLE |
| C3ORF35 | Low | <a href="#">KIF5B</a>    | MITOTIC_SPINDLE |
| C3ORF35 | Low | <a href="#">NUMA1</a>    | MITOTIC_SPINDLE |
| C3ORF35 | Low | <a href="#">LMNB1</a>    | MITOTIC_SPINDLE |
| C3ORF35 | Low | <a href="#">SYNPO</a>    | MITOTIC_SPINDLE |
| C3ORF35 | Low | <a href="#">DYNLL2</a>   | MITOTIC_SPINDLE |
| C3ORF35 | Low | <a href="#">ABL1</a>     | MITOTIC_SPINDLE |
| C3ORF35 | Low | <a href="#">CENPF</a>    | MITOTIC_SPINDLE |
| C3ORF35 | Low | <a href="#">RASAL2</a>   | MITOTIC_SPINDLE |
| C3ORF35 | Low | <a href="#">KIF3B</a>    | MITOTIC_SPINDLE |
| C3ORF35 | Low | <a href="#">ANLN</a>     | MITOTIC_SPINDLE |
| C3ORF35 | Low | <a href="#">KIF3C</a>    | MITOTIC_SPINDLE |
| C3ORF35 | Low | <a href="#">TAOK2</a>    | MITOTIC_SPINDLE |
| C3ORF35 | Low | <a href="#">CDC27</a>    | MITOTIC_SPINDLE |
| C3ORF35 | Low | <a href="#">CD2AP</a>    | MITOTIC_SPINDLE |
| C3ORF35 | Low | <a href="#">ACTN4</a>    | MITOTIC_SPINDLE |
| C3ORF35 | Low | <a href="#">RFC1</a>     | MITOTIC_SPINDLE |
| C3ORF35 | Low | <a href="#">FLNB</a>     | MITOTIC_SPINDLE |
| C3ORF35 | Low | <a href="#">ITSN1</a>    | MITOTIC_SPINDLE |
| C3ORF35 | Low | <a href="#">ABR</a>      | MITOTIC_SPINDLE |
| C3ORF35 | Low | <a href="#">PLEKHG2</a>  | MITOTIC_SPINDLE |
| C3ORF35 | Low | <a href="#">TOP2A</a>    | MITOTIC_SPINDLE |
| C3ORF35 | Low | <a href="#">DLG1</a>     | MITOTIC_SPINDLE |
| C3ORF35 | Low | <a href="#">KIF11</a>    | MITOTIC_SPINDLE |
| C3ORF35 | Low | <a href="#">TUBGCP3</a>  | MITOTIC_SPINDLE |
| C3ORF35 | Low | <a href="#">MYO9B</a>    | MITOTIC_SPINDLE |
| C3ORF35 | Low | <a href="#">BCL2L11</a>  | MITOTIC_SPINDLE |
| C3ORF35 | Low | <a href="#">ALS2</a>     | MITOTIC_SPINDLE |
| C3ORF35 | Low | <a href="#">PCM1</a>     | MITOTIC_SPINDLE |

|         |     |                          |                 |
|---------|-----|--------------------------|-----------------|
| C3ORF35 | Low | <a href="#">SMC4</a>     | MITOTIC_SPINDLE |
| C3ORF35 | Low | <a href="#">NCK2</a>     | MITOTIC_SPINDLE |
| C3ORF35 | Low | <a href="#">PKD2</a>     | MITOTIC_SPINDLE |
| C3ORF35 | Low | <a href="#">TUBA4A</a>   | MITOTIC_SPINDLE |
| C3ORF35 | Low | <a href="#">RABGAP1</a>  | MITOTIC_SPINDLE |
| C3ORF35 | Low | <a href="#">PCGF5</a>    | MITOTIC_SPINDLE |
| C3ORF35 | Low | <a href="#">CENPE</a>    | MITOTIC_SPINDLE |
| C3ORF35 | Low | <a href="#">PALLD</a>    | MITOTIC_SPINDLE |
| C3ORF35 | Low | <a href="#">WASF1</a>    | MITOTIC_SPINDLE |
| C3ORF35 | Low | <a href="#">PAFAH1B1</a> | MITOTIC_SPINDLE |
| C3ORF35 | Low | <a href="#">LLGL1</a>    | MITOTIC_SPINDLE |
| CASC2   | Low | <a href="#">KLK8</a>     | P53_PATHWAY     |
| CASC2   | Low | <a href="#">CLCA2</a>    | P53_PATHWAY     |
| CASC2   | Low | <a href="#">SLC7A11</a>  | P53_PATHWAY     |
| CASC2   | Low | <a href="#">UPP1</a>     | P53_PATHWAY     |
| CASC2   | Low | <a href="#">PLK2</a>     | P53_PATHWAY     |
| CASC2   | Low | <a href="#">KRT17</a>    | P53_PATHWAY     |
| CASC2   | Low | <a href="#">BMP2</a>     | P53_PATHWAY     |
| CASC2   | Low | <a href="#">NHLH2</a>    | P53_PATHWAY     |
| CASC2   | Low | <a href="#">ZNF365</a>   | P53_PATHWAY     |
| CASC2   | Low | <a href="#">INHBB</a>    | P53_PATHWAY     |
| CASC2   | Low | <a href="#">HBEGF</a>    | P53_PATHWAY     |
| CASC2   | Low | <a href="#">TGFA</a>     | P53_PATHWAY     |
| CASC2   | Low | <a href="#">TNFSF9</a>   | P53_PATHWAY     |
| CASC2   | Low | <a href="#">MXD1</a>     | P53_PATHWAY     |
| CASC2   | Low | <a href="#">OSGIN1</a>   | P53_PATHWAY     |
| CASC2   | Low | <a href="#">ADA</a>      | P53_PATHWAY     |
| CASC2   | Low | <a href="#">SFN</a>      | P53_PATHWAY     |
| CASC2   | Low | <a href="#">IL1A</a>     | P53_PATHWAY     |
| CASC2   | Low | <a href="#">SERPINB5</a> | P53_PATHWAY     |
| CASC2   | Low | <a href="#">NDRG1</a>    | P53_PATHWAY     |
| CASC2   | Low | <a href="#">CASP1</a>    | P53_PATHWAY     |
| CASC2   | Low | <a href="#">BAK1</a>     | P53_PATHWAY     |
| CASC2   | Low | <a href="#">RRAD</a>     | P53_PATHWAY     |
| CASC2   | Low | <a href="#">TGFB1</a>    | P53_PATHWAY     |
| CASC2   | Low | <a href="#">PROCR</a>    | P53_PATHWAY     |
| CASC2   | Low | <a href="#">TNNI1</a>    | P53_PATHWAY     |
| CASC2   | Low | <a href="#">CDH13</a>    | P53_PATHWAY     |
| CASC2   | Low | <a href="#">RAP2B</a>    | P53_PATHWAY     |
| CASC2   | Low | <a href="#">TRIB3</a>    | P53_PATHWAY     |
| CASC2   | Low | <a href="#">ST14</a>     | P53_PATHWAY     |
| CASC2   | Low | <a href="#">SLC19A2</a>  | P53_PATHWAY     |
| CASC2   | Low | <a href="#">PVT1</a>     | P53_PATHWAY     |
| CASC2   | Low | <a href="#">AK1</a>      | P53_PATHWAY     |

|       |     |                          |             |
|-------|-----|--------------------------|-------------|
| CASC2 | Low | <a href="#">CDKN1A</a>   | P53_PATHWAY |
| CASC2 | Low | <a href="#">CDK5R1</a>   | P53_PATHWAY |
| CASC2 | Low | <a href="#">FOS</a>      | P53_PATHWAY |
| CASC2 | Low | <a href="#">VDR</a>      | P53_PATHWAY |
| CASC2 | Low | <a href="#">GM2A</a>     | P53_PATHWAY |
| CASC2 | Low | <a href="#">KIF13B</a>   | P53_PATHWAY |
| CASC2 | Low | <a href="#">S100A10</a>  | P53_PATHWAY |
| CASC2 | Low | <a href="#">PLK3</a>     | P53_PATHWAY |
| CASC2 | Low | <a href="#">HMOX1</a>    | P53_PATHWAY |
| CASC2 | Low | <a href="#">SLC3A2</a>   | P53_PATHWAY |
| CASC2 | Low | <a href="#">TM4SF1</a>   | P53_PATHWAY |
| CASC2 | Low | <a href="#">CD82</a>     | P53_PATHWAY |
| CASC2 | Low | <a href="#">PERP</a>     | P53_PATHWAY |
| CASC2 | Low | <a href="#">ITGB4</a>    | P53_PATHWAY |
| CASC2 | Low | <a href="#">SDC1</a>     | P53_PATHWAY |
| CASC2 | Low | <a href="#">IUN</a>      | P53_PATHWAY |
| CASC2 | Low | <a href="#">TAX1BP3</a>  | P53_PATHWAY |
| CASC2 | Low | <a href="#">CEBPA</a>    | P53_PATHWAY |
| CASC2 | Low | <a href="#">CCNK</a>     | P53_PATHWAY |
| CASC2 | Low | <a href="#">CDKN2B</a>   | P53_PATHWAY |
| CASC2 | Low | <a href="#">HRAS</a>     | P53_PATHWAY |
| CASC2 | Low | <a href="#">NUDT15</a>   | P53_PATHWAY |
| CASC2 | Low | <a href="#">EPS8L2</a>   | P53_PATHWAY |
| CASC2 | Low | <a href="#">BAIAP2</a>   | P53_PATHWAY |
| CASC2 | Low | <a href="#">AEN</a>      | P53_PATHWAY |
| CASC2 | Low | <a href="#">EPHA2</a>    | P53_PATHWAY |
| CASC2 | Low | <a href="#">RHBDF2</a>   | P53_PATHWAY |
| CASC2 | Low | <a href="#">IER3</a>     | P53_PATHWAY |
| CASC2 | Low | <a href="#">PTPRE</a>    | P53_PATHWAY |
| CASC2 | Low | <a href="#">EI24</a>     | P53_PATHWAY |
| CASC2 | Low | <a href="#">TAP1</a>     | P53_PATHWAY |
| CASC2 | Low | <a href="#">PPP1R15A</a> | P53_PATHWAY |
| CASC2 | Low | <a href="#">FDXR</a>     | P53_PATHWAY |
| CASC2 | Low | <a href="#">JAG2</a>     | P53_PATHWAY |
| CASC2 | Low | <a href="#">ALOX15B</a>  | P53_PATHWAY |
| CASC2 | Low | <a href="#">MAPKAPK3</a> | P53_PATHWAY |
| CASC2 | Low | <a href="#">PHLDA3</a>   | P53_PATHWAY |
| CASC2 | Low | <a href="#">GADD45A</a>  | P53_PATHWAY |
| CASC2 | Low | <a href="#">PDGFA</a>    | P53_PATHWAY |
| CASC2 | Low | <a href="#">IER5</a>     | P53_PATHWAY |
| CASC2 | Low | <a href="#">MXD4</a>     | P53_PATHWAY |
| CASC2 | Low | <a href="#">APP</a>      | P53_PATHWAY |
| CASC2 | Low | <a href="#">DDIT4</a>    | P53_PATHWAY |
| CASC2 | Low | <a href="#">CD81</a>     | P53_PATHWAY |

|       |     |                          |                 |
|-------|-----|--------------------------|-----------------|
| CASC2 | Low | <a href="#">PITPNC1</a>  | P53_PATHWAY     |
| CASC2 | Low | <a href="#">CTSD</a>     | P53_PATHWAY     |
| CASC2 | Low | <a href="#">F2R</a>      | P53_PATHWAY     |
| CASC2 | Low | <a href="#">VWA5A</a>    | P53_PATHWAY     |
| CASC2 | Low | <a href="#">CCND2</a>    | P53_PATHWAY     |
| CASC2 | Low | <a href="#">TCHH</a>     | P53_PATHWAY     |
| CASC2 | Low | <a href="#">ZFP36L1</a>  | P53_PATHWAY     |
| CASC2 | Low | <a href="#">LIF</a>      | P53_PATHWAY     |
| MEG3  | Low | <a href="#">RAPGEF6</a>  | MITOTIC_SPINDLE |
| MEG3  | Low | <a href="#">BRCA2</a>    | MITOTIC_SPINDLE |
| MEG3  | Low | <a href="#">RASA2</a>    | MITOTIC_SPINDLE |
| MEG3  | Low | <a href="#">LATS1</a>    | MITOTIC_SPINDLE |
| MEG3  | Low | <a href="#">PPP4R2</a>   | MITOTIC_SPINDLE |
| MEG3  | Low | <a href="#">INCENP</a>   | MITOTIC_SPINDLE |
| MEG3  | Low | <a href="#">OPHN1</a>    | MITOTIC_SPINDLE |
| MEG3  | Low | <a href="#">KIF20B</a>   | MITOTIC_SPINDLE |
| MEG3  | Low | <a href="#">ESPL1</a>    | MITOTIC_SPINDLE |
| MEG3  | Low | <a href="#">LMNB1</a>    | MITOTIC_SPINDLE |
| MEG3  | Low | <a href="#">SASS6</a>    | MITOTIC_SPINDLE |
| MEG3  | Low | <a href="#">FGD6</a>     | MITOTIC_SPINDLE |
| MEG3  | Low | <a href="#">SHROOM2</a>  | MITOTIC_SPINDLE |
| MEG3  | Low | <a href="#">ARHGAP5</a>  | MITOTIC_SPINDLE |
| MEG3  | Low | <a href="#">EPB41</a>    | MITOTIC_SPINDLE |
| MEG3  | Low | <a href="#">KIF11</a>    | MITOTIC_SPINDLE |
| MEG3  | Low | <a href="#">NOTCH2</a>   | MITOTIC_SPINDLE |
| MEG3  | Low | <a href="#">TIAM1</a>    | MITOTIC_SPINDLE |
| MEG3  | Low | <a href="#">SMC3</a>     | MITOTIC_SPINDLE |
| MEG3  | Low | <a href="#">WASF2</a>    | MITOTIC_SPINDLE |
| MEG3  | Low | <a href="#">DOCK2</a>    | MITOTIC_SPINDLE |
| MEG3  | Low | <a href="#">ARHGEF3</a>  | MITOTIC_SPINDLE |
| MEG3  | Low | <a href="#">TTK</a>      | MITOTIC_SPINDLE |
| MEG3  | Low | <a href="#">APC</a>      | MITOTIC_SPINDLE |
| MEG3  | Low | <a href="#">ARHGEF12</a> | MITOTIC_SPINDLE |
| MEG3  | Low | <a href="#">SOS1</a>     | MITOTIC_SPINDLE |
| MEG3  | Low | <a href="#">ROCK1</a>    | MITOTIC_SPINDLE |
| MEG3  | Low | <a href="#">BUB1</a>     | MITOTIC_SPINDLE |
| MEG3  | Low | <a href="#">NUSAP1</a>   | MITOTIC_SPINDLE |
| MEG3  | Low | <a href="#">ANLN</a>     | MITOTIC_SPINDLE |
| MEG3  | Low | <a href="#">KIF15</a>    | MITOTIC_SPINDLE |
| MEG3  | Low | <a href="#">FGD4</a>     | MITOTIC_SPINDLE |
| MEG3  | Low | <a href="#">RALBP1</a>   | MITOTIC_SPINDLE |
| MEG3  | Low | <a href="#">PCGF5</a>    | MITOTIC_SPINDLE |
| MEG3  | Low | <a href="#">ECT2</a>     | MITOTIC_SPINDLE |
| MEG3  | Low | <a href="#">CENPF</a>    | MITOTIC_SPINDLE |

|      |     |                          |                 |
|------|-----|--------------------------|-----------------|
| MEG3 | Low | <a href="#">TOP2A</a>    | MITOTIC_SPINDLE |
| MEG3 | Low | <a href="#">BCL2L11</a>  | MITOTIC_SPINDLE |
| MEG3 | Low | <a href="#">CDC42EP4</a> | MITOTIC_SPINDLE |
| MEG3 | Low | <a href="#">CEP192</a>   | MITOTIC_SPINDLE |
| MEG3 | Low | <a href="#">RHOE</a>     | MITOTIC_SPINDLE |
| MEG3 | Low | <a href="#">ARFGEF1</a>  | MITOTIC_SPINDLE |
| MEG3 | Low | <a href="#">FBXO5</a>    | MITOTIC_SPINDLE |
| MEG3 | Low | <a href="#">TUBGCP3</a>  | MITOTIC_SPINDLE |
| MEG3 | Low | <a href="#">RAB3GAP1</a> | MITOTIC_SPINDLE |
| MEG3 | Low | <a href="#">RFC1</a>     | MITOTIC_SPINDLE |
| MEG3 | Low | <a href="#">WASF1</a>    | MITOTIC_SPINDLE |
| MEG3 | Low | <a href="#">ARF6</a>     | MITOTIC_SPINDLE |
| MEG3 | Low | <a href="#">CKAP5</a>    | MITOTIC_SPINDLE |
| MEG3 | Low | <a href="#">NF1</a>      | MITOTIC_SPINDLE |
| MEG3 | Low | <a href="#">SMC4</a>     | MITOTIC_SPINDLE |
| MEG3 | Low | <a href="#">PRC1</a>     | MITOTIC_SPINDLE |
| MEG3 | Low | <a href="#">CENPE</a>    | MITOTIC_SPINDLE |
| MEG3 | Low | <a href="#">SMC1A</a>    | MITOTIC_SPINDLE |
| MEG3 | Low | <a href="#">FLNB</a>     | MITOTIC_SPINDLE |
| MEG3 | Low | <a href="#">TPX2</a>     | MITOTIC_SPINDLE |
| MEG3 | Low | <a href="#">LLGL1</a>    | MITOTIC_SPINDLE |
| MEG3 | Low | <a href="#">NET1</a>     | MITOTIC_SPINDLE |
| MEG3 | Low | <a href="#">KIF5B</a>    | MITOTIC_SPINDLE |
| MEG3 | Low | <a href="#">CLIP1</a>    | MITOTIC_SPINDLE |
| MEG3 | Low | <a href="#">KIF4A</a>    | MITOTIC_SPINDLE |
| MEG3 | Low | <a href="#">ARHGAP27</a> | MITOTIC_SPINDLE |
| MEG3 | Low | <a href="#">CD2AP</a>    | MITOTIC_SPINDLE |
| MEG3 | Low | <a href="#">RACGAP1</a>  | MITOTIC_SPINDLE |
| MEG3 | Low | <a href="#">ALMS1</a>    | MITOTIC_SPINDLE |
| MEG3 | Low | <a href="#">NUMA1</a>    | MITOTIC_SPINDLE |
| MEG3 | Low | <a href="#">CDK1</a>     | MITOTIC_SPINDLE |
| MEG3 | Low | <a href="#">SPTBN1</a>   | MITOTIC_SPINDLE |
| MEG3 | Low | <a href="#">RAPGEF5</a>  | MITOTIC_SPINDLE |
| MEG3 | Low | <a href="#">RASA1</a>    | MITOTIC_SPINDLE |
| MEG3 | Low | <a href="#">KIF23</a>    | MITOTIC_SPINDLE |
| MEG3 | Low | <a href="#">WASL</a>     | MITOTIC_SPINDLE |
| MEG3 | Low | <a href="#">KIF2C</a>    | MITOTIC_SPINDLE |
| MEG3 | Low | <a href="#">ABI1</a>     | MITOTIC_SPINDLE |
| MEG3 | Low | <a href="#">NDC80</a>    | MITOTIC_SPINDLE |
| MEG3 | Low | <a href="#">PDLIM5</a>   | MITOTIC_SPINDLE |
| MEG3 | Low | <a href="#">AURKA</a>    | MITOTIC_SPINDLE |
| MEG3 | Low | <a href="#">KIF3B</a>    | MITOTIC_SPINDLE |
| MEG3 | Low | <a href="#">MYO1E</a>    | MITOTIC_SPINDLE |
| MEG3 | Low | <a href="#">CCDC88A</a>  | MITOTIC_SPINDLE |

|      |     |                          |                 |
|------|-----|--------------------------|-----------------|
| MEG3 | Low | <a href="#">SORBS2</a>   | MITOTIC_SPINDLE |
| MEG3 | Low | <a href="#">TLK1</a>     | MITOTIC_SPINDLE |
| MEG3 | Low | <a href="#">HOOK3</a>    | MITOTIC_SPINDLE |
| MEG3 | Low | <a href="#">DLGAP5</a>   | MITOTIC_SPINDLE |
| MEG3 | Low | <a href="#">MAPRE1</a>   | MITOTIC_SPINDLE |
| MEG3 | Low | <a href="#">PREX1</a>    | MITOTIC_SPINDLE |
| MEG3 | Low | <a href="#">VCL</a>      | MITOTIC_SPINDLE |
| MEG3 | Low | <a href="#">TRIO</a>     | MITOTIC_SPINDLE |
| MEG3 | Low | <a href="#">RICTOR</a>   | MITOTIC_SPINDLE |
| MEG3 | Low | <a href="#">ACTN4</a>    | MITOTIC_SPINDLE |
| MEG3 | Low | <a href="#">SPTAN1</a>   | MITOTIC_SPINDLE |
| MEG3 | Low | <a href="#">ARHGEF11</a> | MITOTIC_SPINDLE |
| MEG3 | Low | <a href="#">ITSN1</a>    | MITOTIC_SPINDLE |
| MEG3 | Low | <a href="#">KIF1B</a>    | MITOTIC_SPINDLE |
| MEG3 | Low | <a href="#">RANBP9</a>   | MITOTIC_SPINDLE |
| MEG3 | Low | <a href="#">NCK1</a>     | MITOTIC_SPINDLE |
| MEG3 | Low | <a href="#">CEP250</a>   | MITOTIC_SPINDLE |
| MEG3 | Low | <a href="#">NEK2</a>     | MITOTIC_SPINDLE |
| MEG3 | Low | <a href="#">CENPI</a>    | MITOTIC_SPINDLE |
| MEG3 | Low | <a href="#">STAU1</a>    | MITOTIC_SPINDLE |
| MEG3 | Low | <a href="#">DST</a>      | MITOTIC_SPINDLE |
| MEG3 | Low | <a href="#">ABR</a>      | MITOTIC_SPINDLE |
| MEG3 | Low | <a href="#">NCK2</a>     | MITOTIC_SPINDLE |
| MEG3 | Low | <a href="#">DLG1</a>     | MITOTIC_SPINDLE |
| MEG3 | Low | <a href="#">SSH2</a>     | MITOTIC_SPINDLE |
| MEG3 | Low | <a href="#">CDC42BPA</a> | MITOTIC_SPINDLE |
| MEG3 | Low | <a href="#">KNTC1</a>    | MITOTIC_SPINDLE |
| MEG3 | Low | <a href="#">CLASP1</a>   | MITOTIC_SPINDLE |
| MEG3 | Low | <a href="#">EZR</a>      | MITOTIC_SPINDLE |
| MEG3 | Low | <a href="#">RABGAP1</a>  | MITOTIC_SPINDLE |
| MEG3 | Low | <a href="#">NIN</a>      | MITOTIC_SPINDLE |
| MEG3 | Low | <a href="#">LRPPRC</a>   | MITOTIC_SPINDLE |
| MEG3 | Low | <a href="#">TAOK2</a>    | MITOTIC_SPINDLE |
| MEG3 | Low | <a href="#">PLK1</a>     | MITOTIC_SPINDLE |
| MEG3 | Low | <a href="#">DYNLL2</a>   | MITOTIC_SPINDLE |
| MEG3 | Low | <a href="#">CCNB2</a>    | MITOTIC_SPINDLE |
| MEG3 | Low | <a href="#">PAFAH1B1</a> | MITOTIC_SPINDLE |
| MEG3 | Low | <a href="#">CDC27</a>    | MITOTIC_SPINDLE |
| MEG3 | Low | <a href="#">PCM1</a>     | MITOTIC_SPINDLE |
| MEG3 | Low | <a href="#">GEMIN4</a>   | MITOTIC_SPINDLE |
| MEG3 | Low | <a href="#">CEP72</a>    | MITOTIC_SPINDLE |
| MEG3 | Low | <a href="#">BARD1</a>    | G2M_CHECKPOINT  |
| MEG3 | Low | <a href="#">CCNT1</a>    | G2M_CHECKPOINT  |
| MEG3 | Low | <a href="#">BRCA2</a>    | G2M_CHECKPOINT  |

|      |     |                          |                |
|------|-----|--------------------------|----------------|
| MEG3 | Low | <a href="#">STIL</a>     | G2M_CHECKPOINT |
| MEG3 | Low | <a href="#">RBL1</a>     | G2M_CHECKPOINT |
| MEG3 | Low | <a href="#">SLC38A1</a>  | G2M_CHECKPOINT |
| MEG3 | Low | <a href="#">RPS6KA5</a>  | G2M_CHECKPOINT |
| MEG3 | Low | <a href="#">PTTG3P</a>   | G2M_CHECKPOINT |
| MEG3 | Low | <a href="#">INCENP</a>   | G2M_CHECKPOINT |
| MEG3 | Low | <a href="#">CDKN2C</a>   | G2M_CHECKPOINT |
| MEG3 | Low | <a href="#">MKI67</a>    | G2M_CHECKPOINT |
| MEG3 | Low | <a href="#">CASP8AP2</a> | G2M_CHECKPOINT |
| MEG3 | Low | <a href="#">KIF20B</a>   | G2M_CHECKPOINT |
| MEG3 | Low | <a href="#">ESPL1</a>    | G2M_CHECKPOINT |
| MEG3 | Low | <a href="#">CDC25A</a>   | G2M_CHECKPOINT |
| MEG3 | Low | <a href="#">LMNB1</a>    | G2M_CHECKPOINT |
| MEG3 | Low | <a href="#">KIF11</a>    | G2M_CHECKPOINT |
| MEG3 | Low | <a href="#">TMPO</a>     | G2M_CHECKPOINT |
| MEG3 | Low | <a href="#">NOTCH2</a>   | G2M_CHECKPOINT |
| MEG3 | Low | <a href="#">PURA</a>     | G2M_CHECKPOINT |
| MEG3 | Low | <a href="#">SLC7A1</a>   | G2M_CHECKPOINT |
| MEG3 | Low | <a href="#">TTK</a>      | G2M_CHECKPOINT |
| MEG3 | Low | <a href="#">CDC7</a>     | G2M_CHECKPOINT |
| MEG3 | Low | <a href="#">HMMR</a>     | G2M_CHECKPOINT |
| MEG3 | Low | <a href="#">BUB1</a>     | G2M_CHECKPOINT |
| MEG3 | Low | <a href="#">NUSAP1</a>   | G2M_CHECKPOINT |
| MEG3 | Low | <a href="#">STAG1</a>    | G2M_CHECKPOINT |
| MEG3 | Low | <a href="#">CHEK1</a>    | G2M_CHECKPOINT |
| MEG3 | Low | <a href="#">CCNA2</a>    | G2M_CHECKPOINT |
| MEG3 | Low | <a href="#">SLC7A5</a>   | G2M_CHECKPOINT |
| MEG3 | Low | <a href="#">KIF15</a>    | G2M_CHECKPOINT |
| MEG3 | Low | <a href="#">CENPE</a>    | G2M_CHECKPOINT |
| MEG3 | Low | <a href="#">EXO1</a>     | G2M_CHECKPOINT |
| MEG3 | Low | <a href="#">CCNF</a>     | G2M_CHECKPOINT |
| MEG3 | Low | <a href="#">TOP2A</a>    | G2M_CHECKPOINT |
| MEG3 | Low | <a href="#">PML</a>      | G2M_CHECKPOINT |
| MEG3 | Low | <a href="#">SMARCC1</a>  | G2M_CHECKPOINT |
| MEG3 | Low | <a href="#">TOP1</a>     | G2M_CHECKPOINT |
| MEG3 | Low | <a href="#">PLK4</a>     | G2M_CHECKPOINT |
| MEG3 | Low | <a href="#">SMC2</a>     | G2M_CHECKPOINT |
| MEG3 | Low | <a href="#">FBXO5</a>    | G2M_CHECKPOINT |
| MEG3 | Low | <a href="#">DBF4</a>     | G2M_CHECKPOINT |
| MEG3 | Low | <a href="#">SMC4</a>     | G2M_CHECKPOINT |
| MEG3 | Low | <a href="#">PRC1</a>     | G2M_CHECKPOINT |
| MEG3 | Low | <a href="#">ATRX</a>     | G2M_CHECKPOINT |
| MEG3 | Low | <a href="#">CENPE</a>    | G2M_CHECKPOINT |
| MEG3 | Low | <a href="#">SMC1A</a>    | G2M_CHECKPOINT |



|      |     |                         |                |
|------|-----|-------------------------|----------------|
| MEG3 | Low | <a href="#">EZH2</a>    | G2M_CHECKPOINT |
| MEG3 | Low | <a href="#">TPX2</a>    | G2M_CHECKPOINT |
| MEG3 | Low | <a href="#">ATF5</a>    | G2M_CHECKPOINT |
| MEG3 | Low | <a href="#">KIF5B</a>   | G2M_CHECKPOINT |
| MEG3 | Low | <a href="#">KIF4A</a>   | G2M_CHECKPOINT |
| MEG3 | Low | <a href="#">POLO</a>    | G2M_CHECKPOINT |
| MEG3 | Low | <a href="#">G3BP1</a>   | G2M_CHECKPOINT |
| MEG3 | Low | <a href="#">NUP98</a>   | G2M_CHECKPOINT |
| MEG3 | Low | <a href="#">RACGAP1</a> | G2M_CHECKPOINT |
| MEG3 | Low | <a href="#">HIF1A</a>   | G2M_CHECKPOINT |
| MEG3 | Low | <a href="#">DR1</a>     | G2M_CHECKPOINT |
| MEG3 | Low | <a href="#">SYNCRIP</a> | G2M_CHECKPOINT |
| MEG3 | Low | <a href="#">NUMA1</a>   | G2M_CHECKPOINT |
| MEG3 | Low | <a href="#">CDK1</a>    | G2M_CHECKPOINT |
| MEG3 | Low | <a href="#">AMD1</a>    | G2M_CHECKPOINT |
| MEG3 | Low | <a href="#">KIF23</a>   | G2M_CHECKPOINT |
| MEG3 | Low | <a href="#">TFDP1</a>   | G2M_CHECKPOINT |
| MEG3 | Low | <a href="#">POLE</a>    | G2M_CHECKPOINT |
| MEG3 | Low | <a href="#">MYBL2</a>   | G2M_CHECKPOINT |
| MEG3 | Low | <a href="#">KIF2C</a>   | G2M_CHECKPOINT |
| MEG3 | Low | <a href="#">NDC80</a>   | G2M_CHECKPOINT |
| MEG3 | Low | <a href="#">AURKA</a>   | G2M_CHECKPOINT |
| MEG3 | Low | <a href="#">PBK</a>     | G2M_CHECKPOINT |
| MEG3 | Low | <a href="#">CTCF</a>    | G2M_CHECKPOINT |
| MEG3 | Low | <a href="#">BCL3</a>    | G2M_CHECKPOINT |
| MEG3 | Low | <a href="#">RAD21</a>   | G2M_CHECKPOINT |
| MEG3 | Low | <a href="#">WRN</a>     | G2M_CHECKPOINT |
| MEG3 | Low | <a href="#">ARID4A</a>  | G2M_CHECKPOINT |
| MEG3 | Low | <a href="#">MTF2</a>    | G2M_CHECKPOINT |
| MEG3 | Low | <a href="#">MCM2</a>    | G2M_CHECKPOINT |
| MEG3 | Low | <a href="#">HOXC10</a>  | G2M_CHECKPOINT |
| MEG3 | Low | <a href="#">KPNB1</a>   | G2M_CHECKPOINT |
| MEG3 | Low | <a href="#">E2F2</a>    | G2M_CHECKPOINT |
| MEG3 | Low | <a href="#">CHAF1A</a>  | G2M_CHECKPOINT |
| MEG3 | Low | <a href="#">PDS5B</a>   | G2M_CHECKPOINT |
| MEG3 | Low | <a href="#">NOLC1</a>   | G2M_CHECKPOINT |
| MEG3 | Low | <a href="#">HNRNPU</a>  | G2M_CHECKPOINT |
| MEG3 | Low | <a href="#">NEK2</a>    | G2M_CHECKPOINT |
| MEG3 | Low | <a href="#">RBM14</a>   | G2M_CHECKPOINT |
| MEG3 | Low | <a href="#">SMAD3</a>   | G2M_CHECKPOINT |
| MEG3 | Low | <a href="#">CDC25B</a>  | G2M_CHECKPOINT |
| MEG3 | Low | <a href="#">MCM6</a>    | G2M_CHECKPOINT |
| MEG3 | Low | <a href="#">TLE3</a>    | G2M_CHECKPOINT |
| MEG3 | Low | <a href="#">CDC20</a>   | G2M_CHECKPOINT |

|        |      |                          |                                   |
|--------|------|--------------------------|-----------------------------------|
| MEG3   | Low  | <a href="#">GSPT1</a>    | G2M_CHECKPOINT                    |
| MEG3   | Low  | <a href="#">MYC</a>      | G2M_CHECKPOINT                    |
| MEG3   | Low  | <a href="#">ODC1</a>     | G2M_CHECKPOINT                    |
| MEG3   | Low  | <a href="#">BUB3</a>     | G2M_CHECKPOINT                    |
| MEG3   | Low  | <a href="#">LBR</a>      | G2M_CHECKPOINT                    |
| MEG3   | Low  | <a href="#">SOLE</a>     | G2M_CHECKPOINT                    |
| MEG3   | Low  | <a href="#">SFPO</a>     | G2M_CHECKPOINT                    |
| MEG3   | Low  | <a href="#">KPNA2</a>    | G2M_CHECKPOINT                    |
| MEG3   | Low  | <a href="#">TRA2B</a>    | G2M_CHECKPOINT                    |
| MEG3   | Low  | <a href="#">PLK1</a>     | G2M_CHECKPOINT                    |
| MEG3   | Low  | <a href="#">HIRA</a>     | G2M_CHECKPOINT                    |
| MEG3   | Low  | <a href="#">UPF1</a>     | G2M_CHECKPOINT                    |
| MEG3   | Low  | <a href="#">CCNB2</a>    | G2M_CHECKPOINT                    |
| MEG3   | Low  | <a href="#">PAFAH1B1</a> | G2M_CHECKPOINT                    |
| MEG3   | Low  | <a href="#">CDC27</a>    | G2M_CHECKPOINT                    |
| SFTA1P | High | <a href="#">THBD</a>     | ANGIOGENESIS                      |
| SFTA1P | High | <a href="#">CCND2</a>    | ANGIOGENESIS                      |
| SFTA1P | High | <a href="#">SPP1</a>     | ANGIOGENESIS                      |
| SFTA1P | High | <a href="#">NRP1</a>     | ANGIOGENESIS                      |
| SFTA1P | High | <a href="#">PF4</a>      | ANGIOGENESIS                      |
| SFTA1P | High | <a href="#">LRPAP1</a>   | ANGIOGENESIS                      |
| SFTA1P | High | <a href="#">JAG1</a>     | ANGIOGENESIS                      |
| SFTA1P | High | <a href="#">TNFRSF21</a> | ANGIOGENESIS                      |
| SFTA1P | High | <a href="#">FGFR1</a>    | ANGIOGENESIS                      |
| SFTA1P | High | <a href="#">APP</a>      | ANGIOGENESIS                      |
| SFTA1P | High | <a href="#">JAG2</a>     | ANGIOGENESIS                      |
| SFTA1P | High | <a href="#">PDGFA</a>    | ANGIOGENESIS                      |
| SFTA1P | High | <a href="#">PRG2</a>     | ANGIOGENESIS                      |
| SFTA1P | High | <a href="#">PGLYRP1</a>  | ANGIOGENESIS                      |
| SFTA1P | High | <a href="#">TIMP1</a>    | ANGIOGENESIS                      |
| SFTA1P | High | <a href="#">LUM</a>      | ANGIOGENESIS                      |
| SFTA1P | High | <a href="#">VAV2</a>     | ANGIOGENESIS                      |
| SFTA1P | High | <a href="#">KCNJ8</a>    | ANGIOGENESIS                      |
| SFTA1P | High | <a href="#">COL3A1</a>   | ANGIOGENESIS                      |
| SFTA1P | High | <a href="#">VCAN</a>     | ANGIOGENESIS                      |
| SFTA1P | High | <a href="#">FSTL1</a>    | ANGIOGENESIS                      |
| SFTA1P | High | <a href="#">POSTN</a>    | ANGIOGENESIS                      |
| SFTA1P | High | <a href="#">APOH</a>     | ANGIOGENESIS                      |
| SFTA1P | High | <a href="#">COL5A2</a>   | ANGIOGENESIS                      |
| SFTA1P | High | <a href="#">OLR1</a>     | ANGIOGENESIS                      |
| SFTA1P | High | <a href="#">VTN</a>      | ANGIOGENESIS                      |
| SFTA1P | High | <a href="#">MSX1</a>     | ANGIOGENESIS                      |
| SFTA1P | High | <a href="#">SGCG</a>     | EPITHELIAL_MESENCHYMAL_TRANSITION |
| SFTA1P | High | <a href="#">PLOD3</a>    | EPITHELIAL_MESENCHYMAL_TRANSITION |

|        |      |                         |                                   |
|--------|------|-------------------------|-----------------------------------|
| SFTA1P | High | <a href="#">LAMC1</a>   | EPITHELIAL_MESENCHYMAL_TRANSITION |
| SFTA1P | High | <a href="#">FMOD</a>    | EPITHELIAL_MESENCHYMAL_TRANSITION |
| SFTA1P | High | <a href="#">SDC4</a>    | EPITHELIAL_MESENCHYMAL_TRANSITION |
| SFTA1P | High | <a href="#">FLNA</a>    | EPITHELIAL_MESENCHYMAL_TRANSITION |
| SFTA1P | High | <a href="#">GADD45A</a> | EPITHELIAL_MESENCHYMAL_TRANSITION |
| SFTA1P | High | <a href="#">VIM</a>     | EPITHELIAL_MESENCHYMAL_TRANSITION |
| SFTA1P | High | <a href="#">CALU</a>    | EPITHELIAL_MESENCHYMAL_TRANSITION |
| SFTA1P | High | <a href="#">COL4A1</a>  | EPITHELIAL_MESENCHYMAL_TRANSITION |
| SFTA1P | High | <a href="#">CD59</a>    | EPITHELIAL_MESENCHYMAL_TRANSITION |
| SFTA1P | High | <a href="#">COL4A2</a>  | EPITHELIAL_MESENCHYMAL_TRANSITION |
| SFTA1P | High | <a href="#">COL7A1</a>  | EPITHELIAL_MESENCHYMAL_TRANSITION |
| SFTA1P | High | <a href="#">PMP22</a>   | EPITHELIAL_MESENCHYMAL_TRANSITION |
| SFTA1P | High | <a href="#">IL32</a>    | EPITHELIAL_MESENCHYMAL_TRANSITION |
| SFTA1P | High | <a href="#">OXTR</a>    | EPITHELIAL_MESENCHYMAL_TRANSITION |
| SFTA1P | High | <a href="#">MMP14</a>   | EPITHELIAL_MESENCHYMAL_TRANSITION |
| SFTA1P | High | <a href="#">ITGB1</a>   | EPITHELIAL_MESENCHYMAL_TRANSITION |
| SFTA1P | High | <a href="#">GADD45B</a> | EPITHELIAL_MESENCHYMAL_TRANSITION |
| SFTA1P | High | <a href="#">DCN</a>     | EPITHELIAL_MESENCHYMAL_TRANSITION |
| SFTA1P | High | <a href="#">FBN2</a>    | EPITHELIAL_MESENCHYMAL_TRANSITION |
| SFTA1P | High | <a href="#">TIMP1</a>   | EPITHELIAL_MESENCHYMAL_TRANSITION |
| SFTA1P | High | <a href="#">PRRX1</a>   | EPITHELIAL_MESENCHYMAL_TRANSITION |
| SFTA1P | High | <a href="#">RHOB</a>    | EPITHELIAL_MESENCHYMAL_TRANSITION |
| SFTA1P | High | <a href="#">LUM</a>     | EPITHELIAL_MESENCHYMAL_TRANSITION |
| SFTA1P | High | <a href="#">PLOD1</a>   | EPITHELIAL_MESENCHYMAL_TRANSITION |
| SFTA1P | High | <a href="#">TGFB1</a>   | EPITHELIAL_MESENCHYMAL_TRANSITION |
| SFTA1P | High | <a href="#">THY1</a>    | EPITHELIAL_MESENCHYMAL_TRANSITION |
| SFTA1P | High | <a href="#">PVR</a>     | EPITHELIAL_MESENCHYMAL_TRANSITION |
| SFTA1P | High | <a href="#">CDH11</a>   | EPITHELIAL_MESENCHYMAL_TRANSITION |
| SFTA1P | High | <a href="#">COL6A3</a>  | EPITHELIAL_MESENCHYMAL_TRANSITION |
| SFTA1P | High | <a href="#">PDGFRB</a>  | EPITHELIAL_MESENCHYMAL_TRANSITION |
| SFTA1P | High | <a href="#">IL6</a>     | EPITHELIAL_MESENCHYMAL_TRANSITION |
| SFTA1P | High | <a href="#">GJA1</a>    | EPITHELIAL_MESENCHYMAL_TRANSITION |
| SFTA1P | High | <a href="#">ANPEP</a>   | EPITHELIAL_MESENCHYMAL_TRANSITION |
| SFTA1P | High | <a href="#">FBN1</a>    | EPITHELIAL_MESENCHYMAL_TRANSITION |
| SFTA1P | High | <a href="#">COL6A2</a>  | EPITHELIAL_MESENCHYMAL_TRANSITION |
| SFTA1P | High | <a href="#">COL3A1</a>  | EPITHELIAL_MESENCHYMAL_TRANSITION |
| SFTA1P | High | <a href="#">SPARC</a>   | EPITHELIAL_MESENCHYMAL_TRANSITION |
| SFTA1P | High | <a href="#">GREM1</a>   | EPITHELIAL_MESENCHYMAL_TRANSITION |
| SFTA1P | High | <a href="#">ACTA2</a>   | EPITHELIAL_MESENCHYMAL_TRANSITION |
| SFTA1P | High | <a href="#">VCAN</a>    | EPITHELIAL_MESENCHYMAL_TRANSITION |
| SFTA1P | High | <a href="#">ECM2</a>    | EPITHELIAL_MESENCHYMAL_TRANSITION |
| SFTA1P | High | <a href="#">COL1A2</a>  | EPITHELIAL_MESENCHYMAL_TRANSITION |
| SFTA1P | High | <a href="#">COL1A1</a>  | EPITHELIAL_MESENCHYMAL_TRANSITION |
| SFTA1P | High | <a href="#">ADAM12</a>  | EPITHELIAL_MESENCHYMAL_TRANSITION |

|        |      |                          |                                   |
|--------|------|--------------------------|-----------------------------------|
| SFTA1P | High | <a href="#">BMP1</a>     | EPITHELIAL_MESENCHYMAL_TRANSITION |
| SFTA1P | High | <a href="#">LRRC15</a>   | EPITHELIAL_MESENCHYMAL_TRANSITION |
| SFTA1P | High | <a href="#">FSTL1</a>    | EPITHELIAL_MESENCHYMAL_TRANSITION |
| SFTA1P | High | <a href="#">MXRA5</a>    | EPITHELIAL_MESENCHYMAL_TRANSITION |
| SFTA1P | High | <a href="#">SNAI2</a>    | EPITHELIAL_MESENCHYMAL_TRANSITION |
| SFTA1P | High | <a href="#">BGN</a>      | EPITHELIAL_MESENCHYMAL_TRANSITION |
| SFTA1P | High | <a href="#">NID2</a>     | EPITHELIAL_MESENCHYMAL_TRANSITION |
| SFTA1P | High | <a href="#">FERMT2</a>   | EPITHELIAL_MESENCHYMAL_TRANSITION |
| SFTA1P | High | <a href="#">CALD1</a>    | EPITHELIAL_MESENCHYMAL_TRANSITION |
| SFTA1P | High | <a href="#">EFEMP2</a>   | EPITHELIAL_MESENCHYMAL_TRANSITION |
| SFTA1P | High | <a href="#">POSTN</a>    | EPITHELIAL_MESENCHYMAL_TRANSITION |
| SFTA1P | High | <a href="#">TPM2</a>     | EPITHELIAL_MESENCHYMAL_TRANSITION |
| SFTA1P | High | <a href="#">LAMA1</a>    | EPITHELIAL_MESENCHYMAL_TRANSITION |
| SFTA1P | High | <a href="#">DKK1</a>     | EPITHELIAL_MESENCHYMAL_TRANSITION |
| SFTA1P | High | <a href="#">TNC</a>      | EPITHELIAL_MESENCHYMAL_TRANSITION |
| SFTA1P | High | <a href="#">FOXC2</a>    | EPITHELIAL_MESENCHYMAL_TRANSITION |
| SFTA1P | High | <a href="#">LGALS1</a>   | EPITHELIAL_MESENCHYMAL_TRANSITION |
| SFTA1P | High | <a href="#">TFPI2</a>    | EPITHELIAL_MESENCHYMAL_TRANSITION |
| SFTA1P | High | <a href="#">MMP2</a>     | EPITHELIAL_MESENCHYMAL_TRANSITION |
| SFTA1P | High | <a href="#">HTRA1</a>    | EPITHELIAL_MESENCHYMAL_TRANSITION |
| SFTA1P | High | <a href="#">MYL9</a>     | EPITHELIAL_MESENCHYMAL_TRANSITION |
| SFTA1P | High | <a href="#">PLAUR</a>    | EPITHELIAL_MESENCHYMAL_TRANSITION |
| SFTA1P | High | <a href="#">PCOLCE</a>   | EPITHELIAL_MESENCHYMAL_TRANSITION |
| SFTA1P | High | <a href="#">SCG2</a>     | EPITHELIAL_MESENCHYMAL_TRANSITION |
| SFTA1P | High | <a href="#">COL16A1</a>  | EPITHELIAL_MESENCHYMAL_TRANSITION |
| SFTA1P | High | <a href="#">ITGA5</a>    | EPITHELIAL_MESENCHYMAL_TRANSITION |
| SFTA1P | High | <a href="#">RGS4</a>     | EPITHELIAL_MESENCHYMAL_TRANSITION |
| SFTA1P | High | <a href="#">SERPINH1</a> | EPITHELIAL_MESENCHYMAL_TRANSITION |
| SFTA1P | High | <a href="#">ITGB3</a>    | EPITHELIAL_MESENCHYMAL_TRANSITION |
| SFTA1P | High | <a href="#">LOXL2</a>    | EPITHELIAL_MESENCHYMAL_TRANSITION |
| SFTA1P | High | <a href="#">SGCD</a>     | EPITHELIAL_MESENCHYMAL_TRANSITION |
| SFTA1P | High | <a href="#">THBS2</a>    | EPITHELIAL_MESENCHYMAL_TRANSITION |
| SFTA1P | High | <a href="#">CAP2</a>     | EPITHELIAL_MESENCHYMAL_TRANSITION |
| SFTA1P | High | <a href="#">EMP3</a>     | EPITHELIAL_MESENCHYMAL_TRANSITION |
| SFTA1P | High | <a href="#">GLIPR1</a>   | EPITHELIAL_MESENCHYMAL_TRANSITION |
| SFTA1P | High | <a href="#">GAS1</a>     | EPITHELIAL_MESENCHYMAL_TRANSITION |
| SFTA1P | High | <a href="#">THBS1</a>    | EPITHELIAL_MESENCHYMAL_TRANSITION |
| SFTA1P | High | <a href="#">COL5A2</a>   | EPITHELIAL_MESENCHYMAL_TRANSITION |
| SFTA1P | High | <a href="#">TPM1</a>     | EPITHELIAL_MESENCHYMAL_TRANSITION |
| SFTA1P | High | <a href="#">COL5A3</a>   | EPITHELIAL_MESENCHYMAL_TRANSITION |
| SFTA1P | High | <a href="#">PMEPA1</a>   | EPITHELIAL_MESENCHYMAL_TRANSITION |
| SFTA1P | High | <a href="#">SERPINE2</a> | EPITHELIAL_MESENCHYMAL_TRANSITION |
| SFTA1P | High | <a href="#">FN1</a>      | EPITHELIAL_MESENCHYMAL_TRANSITION |
| SFTA1P | High | <a href="#">LAMC2</a>    | EPITHELIAL_MESENCHYMAL_TRANSITION |

|        |      |                           |                                   |
|--------|------|---------------------------|-----------------------------------|
| SFTA1P | High | <a href="#">LAMA3</a>     | EPITHELIAL_MESENCHYMAL_TRANSITION |
| SFTA1P | High | <a href="#">COL5A1</a>    | EPITHELIAL_MESENCHYMAL_TRANSITION |
| SFTA1P | High | <a href="#">CTHRC1</a>    | EPITHELIAL_MESENCHYMAL_TRANSITION |
| SFTA1P | High | <a href="#">TAGLN</a>     | EPITHELIAL_MESENCHYMAL_TRANSITION |
| SFTA1P | High | <a href="#">COL11A1</a>   | EPITHELIAL_MESENCHYMAL_TRANSITION |
| SFTA1P | High | <a href="#">TNFRSF12A</a> | EPITHELIAL_MESENCHYMAL_TRANSITION |
| SFTA1P | High | <a href="#">BASP1</a>     | EPITHELIAL_MESENCHYMAL_TRANSITION |
| SFTA1P | High | <a href="#">PTH1LH</a>    | EPITHELIAL_MESENCHYMAL_TRANSITION |
| SFTA1P | High | <a href="#">COL12A1</a>   | EPITHELIAL_MESENCHYMAL_TRANSITION |
| SFTA1P | High | <a href="#">PTX3</a>      | EPITHELIAL_MESENCHYMAL_TRANSITION |
| SFTA1P | High | <a href="#">SERPINE1</a>  | EPITHELIAL_MESENCHYMAL_TRANSITION |
| SFTA1P | High | <a href="#">TIMP3</a>     | EPITHELIAL_MESENCHYMAL_TRANSITION |
| SFTA1P | High | <a href="#">NNMT</a>      | EPITHELIAL_MESENCHYMAL_TRANSITION |
| SFTA1P | High | <a href="#">NTM</a>       | EPITHELIAL_MESENCHYMAL_TRANSITION |
| SFTA1P | High | <a href="#">MSX1</a>      | EPITHELIAL_MESENCHYMAL_TRANSITION |
| SFTA1P | High | <a href="#">SPOCK1</a>    | EPITHELIAL_MESENCHYMAL_TRANSITION |
| SFTA1P | High | <a href="#">CDH2</a>      | EPITHELIAL_MESENCHYMAL_TRANSITION |
| SFTA1P | High | <a href="#">TGFB1</a>     | EPITHELIAL_MESENCHYMAL_TRANSITION |
| SFTA1P | High | <a href="#">AREG</a>      | EPITHELIAL_MESENCHYMAL_TRANSITION |
| SFTA1P | High | <a href="#">NTSE</a>      | EPITHELIAL_MESENCHYMAL_TRANSITION |
| SFTA1P | High | <a href="#">MMP3</a>      | EPITHELIAL_MESENCHYMAL_TRANSITION |
| SFTA1P | High | <a href="#">MATN3</a>     | EPITHELIAL_MESENCHYMAL_TRANSITION |
| SFTA1P | High | <a href="#">INHBA</a>     | EPITHELIAL_MESENCHYMAL_TRANSITION |
| SFTA1P | High | <a href="#">FSTL3</a>     | EPITHELIAL_MESENCHYMAL_TRANSITION |
| SFTA1P | High | <a href="#">MFAP5</a>     | EPITHELIAL_MESENCHYMAL_TRANSITION |
| SFTA1P | High | <a href="#">MMP1</a>      | EPITHELIAL_MESENCHYMAL_TRANSITION |
| SFTA1P | High | <a href="#">FAP</a>       | EPITHELIAL_MESENCHYMAL_TRANSITION |
| SFTA1P | High | <a href="#">VEGFC</a>     | EPITHELIAL_MESENCHYMAL_TRANSITION |
| SNHG3  | High | <a href="#">DAD1</a>      | DNA_REPAIR                        |
| SNHG3  | High | <a href="#">SNAPC5</a>    | DNA_REPAIR                        |
| SNHG3  | High | <a href="#">ERCC1</a>     | DNA_REPAIR                        |
| SNHG3  | High | <a href="#">GTF3C5</a>    | DNA_REPAIR                        |
| SNHG3  | High | <a href="#">FEN1</a>      | DNA_REPAIR                        |
| SNHG3  | High | <a href="#">RPA2</a>      | DNA_REPAIR                        |
| SNHG3  | High | <a href="#">ADRM1</a>     | DNA_REPAIR                        |
| SNHG3  | High | <a href="#">POLD1</a>     | DNA_REPAIR                        |
| SNHG3  | High | <a href="#">SF3A3</a>     | DNA_REPAIR                        |
| SNHG3  | High | <a href="#">RAD51</a>     | DNA_REPAIR                        |
| SNHG3  | High | <a href="#">GTF2B</a>     | DNA_REPAIR                        |
| SNHG3  | High | <a href="#">POLR2E</a>    | DNA_REPAIR                        |
| SNHG3  | High | <a href="#">SUPT4H1</a>   | DNA_REPAIR                        |
| SNHG3  | High | <a href="#">UPF3B</a>     | DNA_REPAIR                        |
| SNHG3  | High | <a href="#">RAE1</a>      | DNA_REPAIR                        |
| SNHG3  | High | <a href="#">CDA</a>       | DNA_REPAIR                        |

|       |      |                        |            |
|-------|------|------------------------|------------|
| SNHG3 | High | <a href="#">HPRT1</a>  | DNA_REPAIR |
| SNHG3 | High | <a href="#">RAD52</a>  | DNA_REPAIR |
| SNHG3 | High | <a href="#">BRF2</a>   | DNA_REPAIR |
| SNHG3 | High | <a href="#">RFC4</a>   | DNA_REPAIR |
| SNHG3 | High | <a href="#">GUK1</a>   | DNA_REPAIR |
| SNHG3 | High | <a href="#">CSTF3</a>  | DNA_REPAIR |
| SNHG3 | High | <a href="#">TYMS</a>   | DNA_REPAIR |
| SNHG3 | High | <a href="#">POLR1D</a> | DNA_REPAIR |
| SNHG3 | High | <a href="#">APRT</a>   | DNA_REPAIR |
| SNHG3 | High | <a href="#">CETN2</a>  | DNA_REPAIR |
| SNHG3 | High | <a href="#">POLR2J</a> | DNA_REPAIR |
| SNHG3 | High | <a href="#">GPX4</a>   | DNA_REPAIR |
| SNHG3 | High | <a href="#">VPS28</a>  | DNA_REPAIR |
| SNHG3 | High | <a href="#">AK1</a>    | DNA_REPAIR |
| SNHG3 | High | <a href="#">MPG</a>    | DNA_REPAIR |
| SNHG3 | High | <a href="#">TAF9</a>   | DNA_REPAIR |
| SNHG3 | High | <a href="#">SURF1</a>  | DNA_REPAIR |
| SNHG3 | High | <a href="#">TAF12</a>  | DNA_REPAIR |
| SNHG3 | High | <a href="#">SNAPC4</a> | DNA_REPAIR |
| SNHG3 | High | <a href="#">EIF1B</a>  | DNA_REPAIR |
| SNHG3 | High | <a href="#">POLL</a>   | DNA_REPAIR |
| SNHG3 | High | <a href="#">ZNF707</a> | DNA_REPAIR |
| SNHG3 | High | <a href="#">GTF2A2</a> | DNA_REPAIR |
| SNHG3 | High | <a href="#">POLD4</a>  | DNA_REPAIR |
| SNHG3 | High | <a href="#">POLR2K</a> | DNA_REPAIR |
| SNHG3 | High | <a href="#">IMPDH2</a> | DNA_REPAIR |
| SNHG3 | High | <a href="#">DUT</a>    | DNA_REPAIR |
| SNHG3 | High | <a href="#">MRPL40</a> | DNA_REPAIR |
| SNHG3 | High | <a href="#">POLR2G</a> | DNA_REPAIR |
| SNHG3 | High | <a href="#">DGUOK</a>  | DNA_REPAIR |
| SNHG3 | High | <a href="#">POLE4</a>  | DNA_REPAIR |
| SNHG3 | High | <a href="#">EDF1</a>   | DNA_REPAIR |
| SNHG3 | High | <a href="#">TAF10</a>  | DNA_REPAIR |
| SNHG3 | High | <a href="#">TARBP2</a> | DNA_REPAIR |
| SNHG3 | High | <a href="#">ITPA</a>   | DNA_REPAIR |
| SNHG3 | High | <a href="#">GTF2H5</a> | DNA_REPAIR |
| SNHG3 | High | <a href="#">TAF1C</a>  | DNA_REPAIR |
| SNHG3 | High | <a href="#">POLB</a>   | DNA_REPAIR |
| SNHG3 | High | <a href="#">NME4</a>   | DNA_REPAIR |
| SNHG3 | High | <a href="#">NME1</a>   | DNA_REPAIR |
| SNHG3 | High | <a href="#">POLR2I</a> | DNA_REPAIR |
| SNHG3 | High | <a href="#">RPA3</a>   | DNA_REPAIR |
| SNHG3 | High | <a href="#">RBX1</a>   | DNA_REPAIR |
| SNHG3 | High | <a href="#">POLR2H</a> | DNA_REPAIR |

|       |      |                        |            |
|-------|------|------------------------|------------|
| SNHG3 | High | <a href="#">POLR2F</a> | DNA_REPAIR |
| SNHG3 | High | <a href="#">BOLA2</a>  | DNA_REPAIR |
| SNHG3 | High | <a href="#">COX17</a>  | DNA_REPAIR |
| SNHG3 | High | <a href="#">POLR1C</a> | DNA_REPAIR |
| SNHG3 | High | <a href="#">NT5C</a>   | DNA_REPAIR |
| SNHG3 | High | <a href="#">SAC3D1</a> | DNA_REPAIR |
| SNHG3 | High | <a href="#">NME3</a>   | DNA_REPAIR |
| SNHG3 | High | <a href="#">CCNO</a>   | DNA_REPAIR |

**Table S8.** Analysis of infiltration of immune cells into tumor tissues and infer tumor purity depending on the lncRNA expression level;  $p < 0.05$  considered significant.

| lncRNA  | Parameter                               | Group | Minimum | Maximum | Range  | Mean   | Std. Deviation | Std. Error of Mean | p-value |
|---------|-----------------------------------------|-------|---------|---------|--------|--------|----------------|--------------------|---------|
| C3orf35 | Stromal_score                           | Low   | -149266 | 146362  | 295628 | -9884  | 55223          | 6554               | 0.3996  |
|         |                                         | High  | -181593 | 164637  | 346230 | -12486 | 45418          | 5280               |         |
|         | Immune_score                            | Low   | -118885 | 235128  | 354013 | 33297  | 65096          | 7672               | 0.1074  |
|         |                                         | High  | -61871  | 205704  | 267575 | 18073  | 50863          | 5913               |         |
|         | ESTIMATE_score                          | Low   | -268151 | 263038  | 531189 | 21424  | 100892         | 11890              | 0.1218  |
|         |                                         | High  | -235981 | 320647  | 556628 | 6241   | 70019          | 8140               |         |
|         | Lymphocyte Infiltration Signature Score | Low   | -1.657  | 2.387   | 4.044  | 0.31   | 0.9491         | 0.1119             | 0.3503  |
|         |                                         | High  | -2.18   | 2.817   | 4.996  | 0.1512 | 1.091          | 0.1268             |         |
| C5orf38 | Stromal_score                           | Low   | -181593 | 164637  | 346230 | -14186 | 60213          | 7146               | 0.989   |
|         |                                         | High  | -135975 | 101927  | 237902 | -8359  | 38690          | 4498               |         |
|         | Immune_score                            | Low   | -118885 | 235128  | 354013 | 41573  | 66943          | 7889               | <0.0001 |
|         |                                         | High  | -89345  | 157608  | 246953 | 10021  | 44362          | 5157               |         |
|         | ESTIMATE_score                          | Low   | -268151 | 320647  | 588798 | 28758  | 100802         | 11880              | 0.0005  |
|         |                                         | High  | -179683 | 215983  | 395666 | -894.9 | 67794          | 7881               |         |
|         | Lymphocyte Infiltration Signature Score | Low   | -1.138  | 2.817   | 3.955  | 0.6422 | 0.9318         | 0.1098             | <0.0001 |
|         |                                         | High  | -2.18   | 2.221   | 4.401  | -0.172 | 0.9499         | 0.1104             |         |
| MEG3    | Stromal_score                           | Low   | -181593 | 146362  | 327955 | -17341 | 56474          | 6655               | 0.0122  |
|         |                                         | High  | -149266 | 164637  | 313903 | -5167  | 42896          | 5021               |         |
|         | Immune_score                            | Low   | -61871  | 205704  | 267575 | 36568  | 62329          | 7346               | 0.1126  |

|             |                                            |      |         |        |        |         |        |        |        |
|-------------|--------------------------------------------|------|---------|--------|--------|---------|--------|--------|--------|
|             |                                            | High | -118885 | 235128 | 354013 | 14890   | 53017  | 6163   |        |
|             | ESTIMATE_score                             | Low  | -235981 | 263038 | 499019 | 10437   | 87816  | 10349  | 0.9735 |
|             |                                            | High | -268151 | 320647 | 588798 | 16931   | 86005  | 9998   |        |
|             | Lymphocyte Infiltration<br>Signature Score | Low  | -1.659  | 2.817  | 4.476  | 0.4054  | 0.9955 | 0.1173 | 0.0334 |
|             |                                            | High | -2.18   | 2.301  | 4.48   | 0.05834 | 1.027  | 0.1194 |        |
| MYCNO<br>S  | Stromal_score                              | Low  | -149266 | 146362 | 295628 | -15205  | 49515  | 5876   | 0.8576 |
|             |                                            | High | -181593 | 164637 | 346230 | -7381   | 51078  | 5938   |        |
|             | Immune_score                               | Low  | -118885 | 146468 | 265353 | 19475   | 49952  | 5887   | 0.4883 |
|             |                                            | High | -89345  | 235128 | 324473 | 31521   | 65764  | 7645   |        |
|             | ESTIMATE_score                             | Low  | -268151 | 215983 | 484134 | 2957    | 81443  | 9598   | 0.3496 |
|             |                                            | High | -235981 | 320647 | 556628 | 24209   | 90781  | 10553  |        |
|             | Lymphocyte Infiltration<br>Signature Score | Low  | -1.832  | 2.301  | 4.133  | 0.04323 | 0.9109 | 0.1074 | 0.0475 |
|             |                                            | High | -2.18   | 2.817  | 4.996  | 0.4108  | 1.097  | 0.1275 |        |
| SNHG3       | Stromal_score                              | Low  | -141047 | 164637 | 305684 | -872.9  | 52258  | 6202   | 0.078  |
|             |                                            | High | -181593 | 89465  | 271058 | -21132  | 46562  | 5413   |        |
|             | Immune_score                               | Low  | -89345  | 205704 | 295049 | 35472   | 62161  | 7326   | 0.0093 |
|             |                                            | High | -118885 | 235128 | 354013 | 15957   | 53626  | 6234   |        |
|             | ESTIMATE_score                             | Low  | -164351 | 320647 | 484998 | 33408   | 93141  | 10977  | 0.0013 |
|             |                                            | High | -268151 | 262986 | 531137 | -5419   | 75677  | 8797   |        |
|             | Lymphocyte Infiltration<br>Signature Score | Low  | -2.18   | 2.817  | 4.996  | 0.4178  | 1.013  | 0.1193 | 0.0243 |
|             |                                            | High | -1.832  | 2.239  | 04.07  | 0.04632 | 1.006  | 0.1169 |        |
| TMEM10<br>5 | Stromal_score                              | Low  | -181593 | 164637 | 346230 | -14914  | 56134  | 6615   | 0.5267 |
|             |                                            | High | -145278 | 146362 | 291640 | -7561   | 43877  | 5135   |        |
|             | Immune_score                               | Low  | -118885 | 235128 | 354013 | 40799   | 71030  | 8371   | 0.0268 |
|             |                                            | High | -89345  | 157608 | 246953 | 10774   | 38297  | 4452   |        |
|             | ESTIMATE_score                             | Low  | -268151 | 320647 | 588798 | 26653   | 107677 | 12690  | 0.0714 |



|          |                                         |      |         |        |        |          |        |        |        |
|----------|-----------------------------------------|------|---------|--------|--------|----------|--------|--------|--------|
|          |                                         | High | -164351 | 209395 | 373746 | 1154     | 57590  | 6695   |        |
|          | Lymphocyte Infiltration Signature Score | Low  | -1.659  | 2.817  | 4.476  | 0.5563   | 1.025  | 0.1208 | 0.0002 |
|          |                                         | High | -2.18   | 2.221  | 4.401  | -0.08841 | 0.9208 | 0.107  |        |
| CASC2    | Stromal_score                           | Low  | -149266 | 99083  | 248349 | -18354   | 51275  | 6085   | 0.1904 |
|          |                                         | High | -181593 | 164637 | 346230 | -4360    | 48703  | 5662   |        |
|          | Immune_score                            | Low  | -118885 | 205704 | 324589 | 26677    | 62006  | 7308   | 0.5674 |
|          |                                         | High | -55276  | 235128 | 290404 | 24514    | 55520  | 6454   |        |
|          | ESTIMATE_score                          | Low  | -268151 | 263038 | 531189 | 9707     | 90680  | 10687  | 0.4201 |
|          |                                         | High | -235981 | 320647 | 556628 | 17641    | 83001  | 9649   |        |
|          | Lymphocyte Infiltration Signature Score | Low  | -1.659  | 2.817  | 4.476  | 0.3203   | 1.034  | 0.1219 | 0.3293 |
|          |                                         | High | -2.18   | 2.387  | 4.566  | 0.1411   | 1.011  | 0.1175 |        |
| C10orf55 | Stromal_score                           | Low  | -149266 | 164637 | 313903 | -14198   | 53348  | 6287   | 0.8825 |
|          |                                         | High | -181593 | 146362 | 327955 | -8267    | 47280  | 5534   |        |
|          | Immune_score                            | Low  | -118885 | 235128 | 354013 | 27905    | 60317  | 7108   | 0.5258 |
|          |                                         | High | -89345  | 205704 | 295049 | 23320    | 57230  | 6653   |        |
|          | ESTIMATE_score                          | Low  | -268151 | 320647 | 588798 | 20288    | 97106  | 11444  | 0.5834 |
|          |                                         | High | -235981 | 241058 | 477039 | 7347     | 75255  | 8748   |        |
|          | Lymphocyte Infiltration Signature Score | Low  | -1.732  | 2.387  | 4.119  | 0.2897   | 1.014  | 0.1195 | 0.5265 |
|          |                                         | High | -2.18   | 2.817  | 4.996  | 0.1709   | 1.035  | 0.1203 |        |
| SFTA1P   | Stromal_score                           | Low  | -181593 | 146362 | 327955 | -15839   | 53263  | 6277   | 0.5139 |
|          |                                         | High | -145278 | 164637 | 309915 | -6648    | 47112  | 5514   |        |
|          | Immune_score                            | Low  | -118885 | 235128 | 354013 | 32104    | 65709  | 7744   | 0.5942 |
|          |                                         | High | -89345  | 205704 | 295049 | 19234    | 50419  | 5861   |        |
|          | ESTIMATE_score                          | Low  | -268151 | 263038 | 531189 | 10372    | 93478  | 11017  | 0.7802 |
|          |                                         | High | -164351 | 320647 | 484998 | 16995    | 79985  | 9298   |        |
|          |                                         | Low  | -2.18   | 2.387  | 4.566  | 0.2283   | 1.039  | 0.1225 | 0.9728 |

|  |                                            |      |        |       |       |        |       |        |  |
|--|--------------------------------------------|------|--------|-------|-------|--------|-------|--------|--|
|  | Lymphocyte Infiltration<br>Signature Score | High | -1.832 | 2.817 | 4.648 | 0.2307 | 1.014 | 0.1178 |  |
|--|--------------------------------------------|------|--------|-------|-------|--------|-------|--------|--|
